# Supplementary material for: Authentication of Shenqi Fuzheng Injection via UPLC-Coupled Ion Mobility—Mass Spectrometry and Chemometrics with Kendrick Mass Defect Filter Data Mining
Source: MDPI journal article supplement (doi:10.3390/molecules27154734), 2022-07-24
Supplement: s1 [file s1]

# Authentication of Shenqi Fuzheng Injection by UHPLC hyphenated ion mobility - mass spectrometry and chemometrics with Kendrick mass defect filter data mining

Xingdong Wu <sup>1,†</sup>, Yaowen Liu <sup>3,1,†</sup>, Zijia Zhang <sup>1</sup>, Zhihuang Ou <sup>4,5</sup>, Guoxiang Wang <sup>4,5</sup>, Tengqian Zhang <sup>1,2</sup>, Huali Long <sup>1</sup>, Min Lei <sup>1</sup>, Liangfeng Liu <sup>4,5</sup>, Wenhua Huang <sup>4,5</sup>, Jinjun Hou <sup>1,\*</sup>, Wanying Wu <sup>1,2,\*</sup>, De-an Guo <sup>1,2</sup>

<sup>1</sup> National Engineering Research Center of TCM Standardization Technology, Shanghai Institute of Materia Medica, Chinese Academy of Sciences, Shanghai 201203, China

<sup>2</sup> University of Chinese Academy of Sciences, Beijing 100049, China

<sup>3</sup> School of Chinese Materia Medica, Nanjing University of Chinese Medicine, Nanjing 210029, China

<sup>4</sup> Limin Pharmaceutical Factory, Livzon Group Limited, Shaoguan, 512028, China

<sup>5</sup> Guangdong Corporate Key Laboratory of High-end Liquid Medicine R&D, Industrialization, Shaoguan, 512028, China.

\* Correspondence: [jinjun\\_hou@simmm.ac.cn](mailto:jinjun_hou@simmm.ac.cn) (J.H.); [wanyingwu@simmm.ac.cn](mailto:wanyingwu@simmm.ac.cn) (W.W.); Tel.: +86 21 50272789

† These authors made equal contributions to this work.

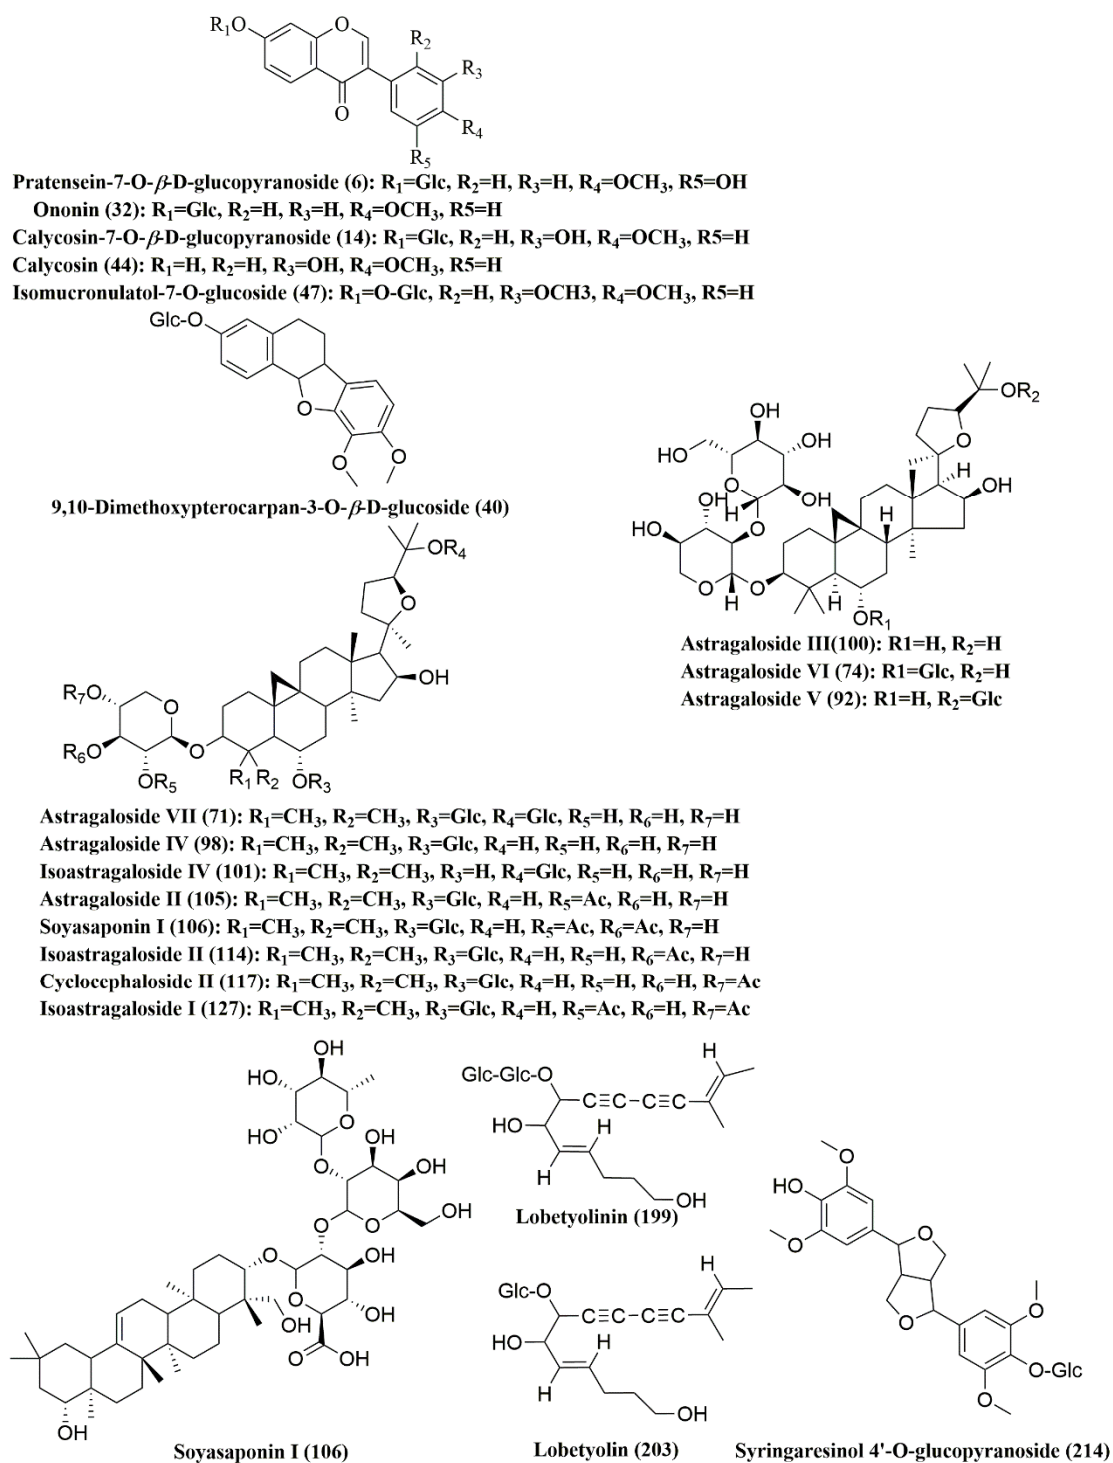

Figure. S1 Chemical structures of nine reference standards.

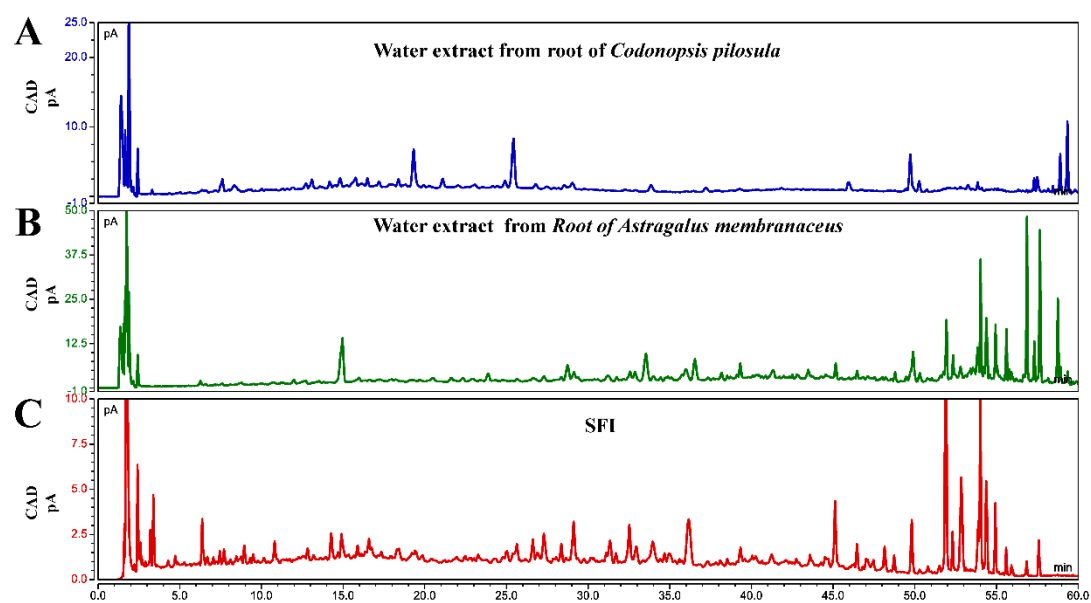

Figure. S2 Fingerprint chromatogram of UHPLC-CAD. (A: *Codonopsis pilosula*, B: *Astragalus membranaceus*, C: SFI)

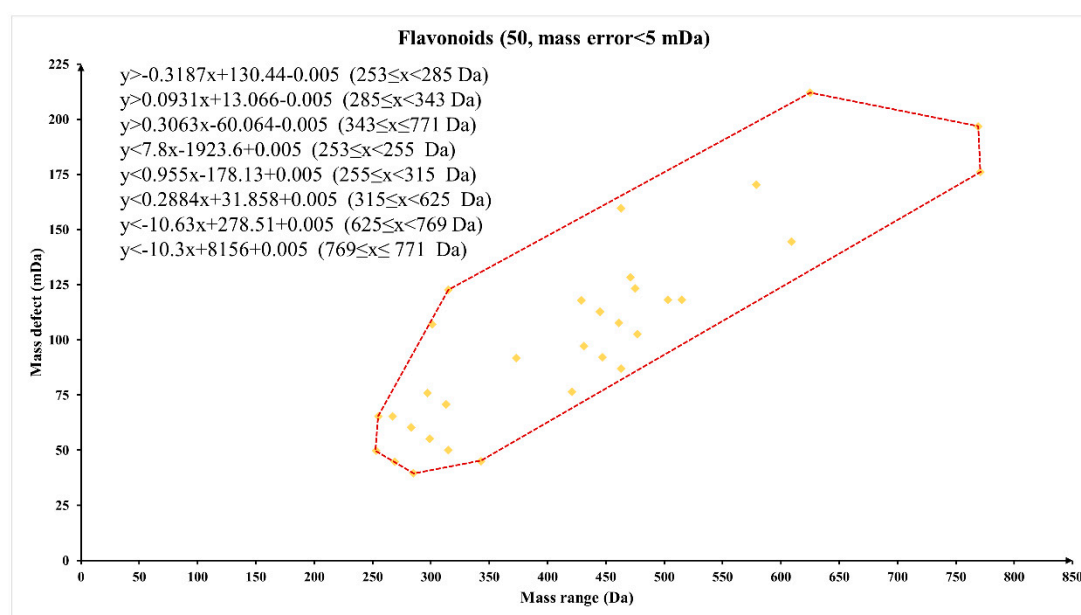

Figure. S3 Definition of PMDF windows of flavonoids through several excel formulas.

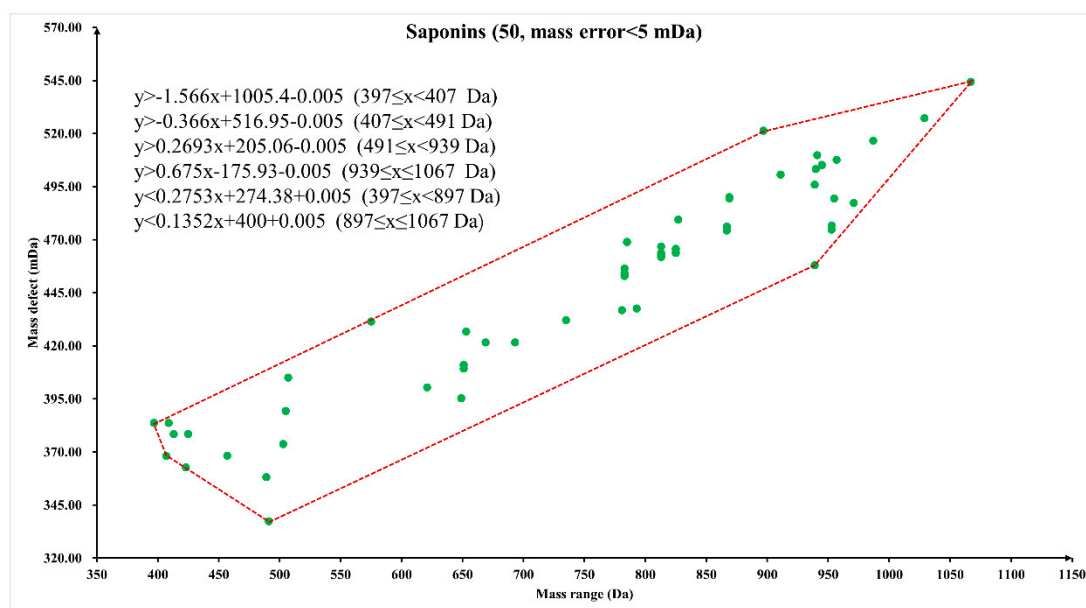

Figure. S4 Definition of PMDF windows of saponins through several excel formulas.

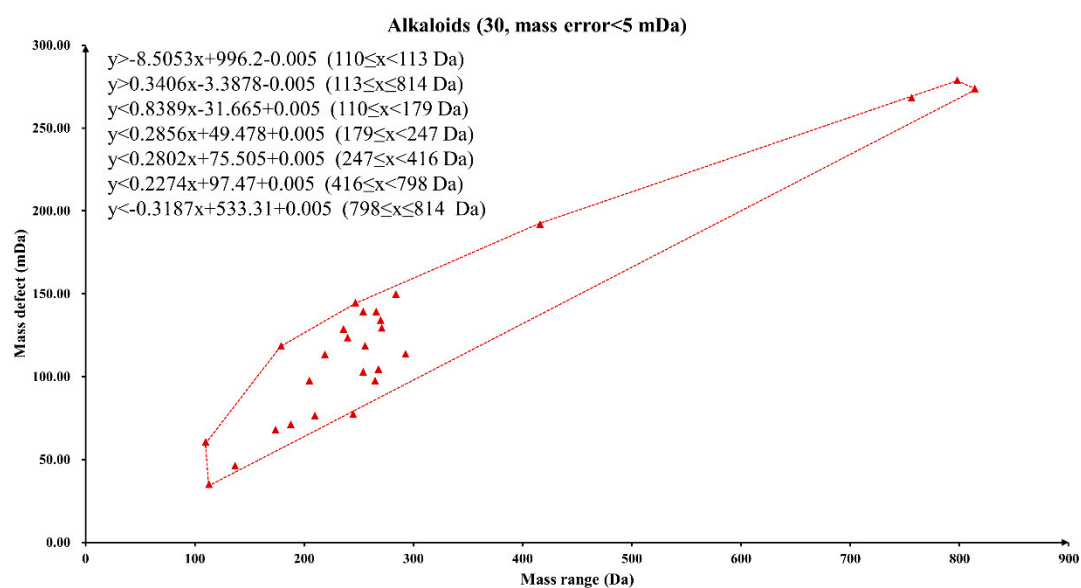

Figure. S5 Definition of PMDF windows of alkaloids through several excel formulas.

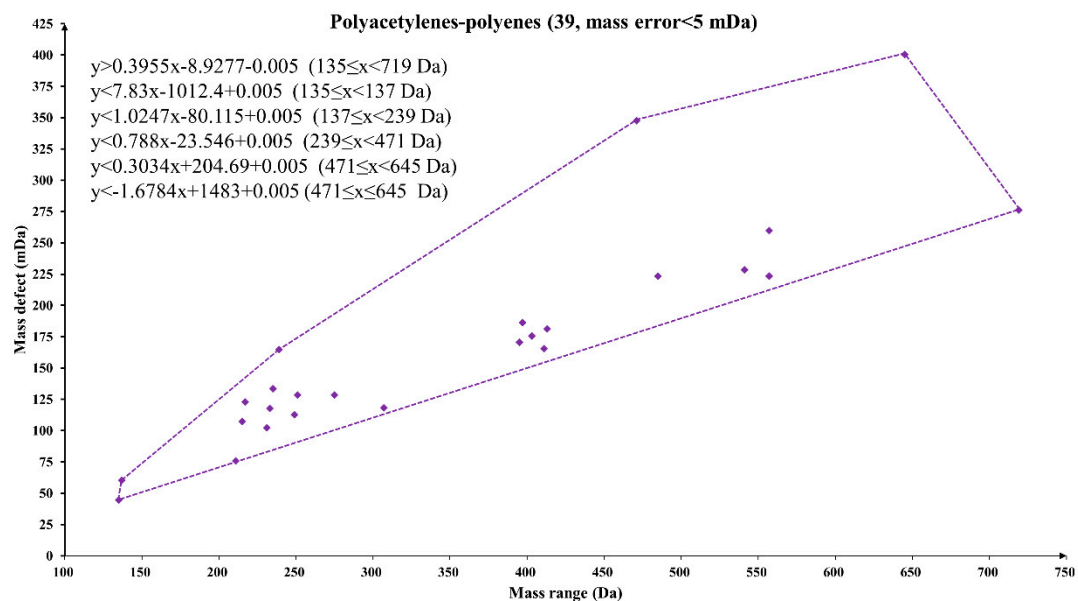

Figure. S6 Definition of PMDF windows of polyacetylenes, and polyenes through several excel formulas.

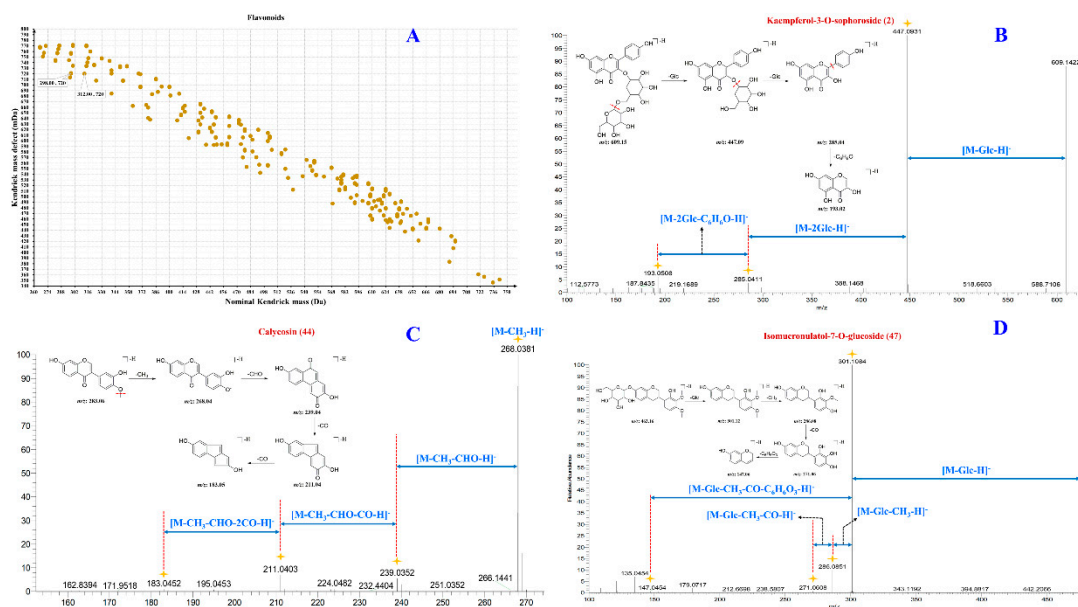

Figure. S7 KMDf scatter plot depicted the m/z values of potential flavonoid components in SFI after PMDF filtering, and the MS/MS spectra and possible MS fragment patterns of the representative flavonoids. (A: KMDf scatter plot

of potential flavonoids; B: kaempferol-3-O-sophoroside; C: calycosin; D: isomucronulatol-7-O-glucoside).

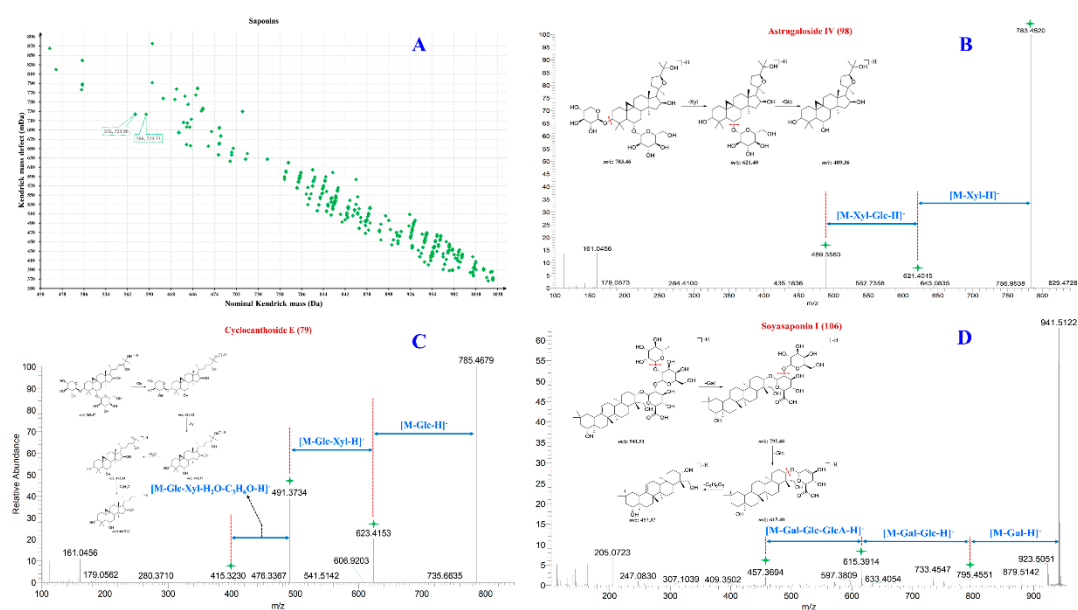

Fig. S8 KMDf scatter plot depicted the m/z values of potential saponin components in SFI after PMDF filtering, and the MS/MS spectra and possible MS fragment patterns of the representative saponins. (A: KMDf scatter plot of potential saponins; Bastragaloside IV; C: cyclocanthoside E; D: Soyasaponin I).

Table S1 The compound information used in establishing the PMDF window  
for flavonoids in SFI

| No. | Compound name                           | Formula                                         | <i>m/z</i> [M-H] <sup>-</sup> (Da) |
|-----|-----------------------------------------|-------------------------------------------------|------------------------------------|
| 1   | Complanaraside                          | C <sub>28</sub> H <sub>32</sub> O <sub>16</sub> | 623.1602                           |
| 2   | Formononetin                            | C <sub>16</sub> H <sub>12</sub> O <sub>4</sub>  | 267.0654                           |
| 3   | Formononetin-7-glucoside                | C <sub>22</sub> H <sub>22</sub> O <sub>9</sub>  | 429.1179                           |
| 4   | Ononin                                  | C <sub>25</sub> H <sub>24</sub> O <sub>12</sub> | 515.1182                           |
| 5   | Genistin                                | C <sub>21</sub> H <sub>20</sub> O <sub>10</sub> | 431.0972                           |
| 6   | Isoliquiritigenin                       | C <sub>15</sub> H <sub>12</sub> O <sub>4</sub>  | 255.0654                           |
| 7   | Isomucronulatol                         | C <sub>17</sub> H <sub>18</sub> O <sub>5</sub>  | 301.1071                           |
| 8   | Isomucronulatol-7-O- $\beta$ -glucoside | C <sub>23</sub> H <sub>28</sub> O <sub>10</sub> | 463.1596                           |
| 9   | Isomucronulatol-7-O-glucoside           | C <sub>23</sub> H <sub>28</sub> O <sub>10</sub> | 463.1596                           |
| 10  | Isomucronulatol-7-2-Di-O-glucoside      | C <sub>29</sub> H <sub>38</sub> O <sub>15</sub> | 625.2121                           |
| 11  | Isoquercitrin                           | C <sub>21</sub> H <sub>20</sub> O <sub>12</sub> | 463.0870                           |
| 12  | Isorhamnetin                            | C <sub>16</sub> H <sub>12</sub> O <sub>7</sub>  | 315.0501                           |
| 13  | Isorhamnetin-3-O-glucoside              | C <sub>22</sub> H <sub>22</sub> O <sub>12</sub> | 477.1026                           |
| 14  | Kaempferol                              | C <sub>15</sub> H <sub>10</sub> O <sub>6</sub>  | 285.0396                           |
| 15  | Kumatakenin                             | C <sub>17</sub> H <sub>14</sub> O <sub>6</sub>  | 313.0708                           |
| 16  | Mucronulatol-7-O-glucopyranoside        | C <sub>23</sub> H <sub>28</sub> O <sub>10</sub> | 463.1596                           |
| 17  | Mangiferin                              | C <sub>19</sub> H <sub>18</sub> O <sub>11</sub> | 421.0765                           |
| 18  | Mucronulatol-7-O-glucoside              | C <sub>23</sub> H <sub>28</sub> O <sub>10</sub> | 463.1596                           |
| 19  | Naringenin-7-Rhamnoglucoside            | C <sub>27</sub> H <sub>32</sub> O <sub>14</sub> | 579.1704                           |
| 20  | Naringin                                | C <sub>27</sub> H <sub>32</sub> O <sub>14</sub> | 579.1704                           |
| 21  | Naringoside                             | C <sub>27</sub> H <sub>32</sub> O <sub>14</sub> | 579.1704                           |
| 22  | Neocomplanoside                         | C <sub>24</sub> H <sub>24</sub> O <sub>12</sub> | 503.1182                           |
| 23  | Odoratin                                | C <sub>17</sub> H <sub>14</sub> O <sub>6</sub>  | 313.0708                           |
| 24  | Odoratin-7-O- $\beta$ -D-glucoside      | C <sub>23</sub> H <sub>24</sub> O <sub>11</sub> | 475.1233                           |
| 25  | Ononin                                  | C <sub>22</sub> H <sub>22</sub> O <sub>9</sub>  | 429.1179                           |
| 26  | Pratensein-7-glucoside                  | C <sub>22</sub> H <sub>22</sub> O <sub>11</sub> | 461.1077                           |
| 27  | Pratensein                              | C <sub>16</sub> H <sub>12</sub> O <sub>6</sub>  | 299.0552                           |
| 28  | Rhamnocitrin                            | C <sub>16</sub> H <sub>12</sub> O <sub>6</sub>  | 299.0552                           |
| 29  | Rutin                                   | C <sub>27</sub> H <sub>30</sub> O <sub>16</sub> | 609.1446                           |

|    |                                                                                                         |           |          |
|----|---------------------------------------------------------------------------------------------------------|-----------|----------|
| 30 | Sissotrin                                                                                               | C22H22O10 | 445.1128 |
| 31 | Ternatin                                                                                                | C19H18O8  | 373.0918 |
| 32 | Wharangin                                                                                               | C17H12O8  | 343.0450 |
| 33 | Wogonin                                                                                                 | C16H12O5  | 283.0603 |
| 34 | 2-Hydroxy-3-4-7-trimethoxyisoflavan                                                                     | C18H20O5  | 315.1227 |
| 35 | 3-O-Methylorobol                                                                                        | C16H12O6  | 299.0552 |
| 36 | Calycosin                                                                                               | C16H12O5  | 283.0603 |
| 37 | 6-O-Acetylononin                                                                                        | C24H24O10 | 471.1284 |
| 38 | 7-O-Methylisomucronulatol                                                                               | C18H20O5  | 315.1227 |
| 39 | Calycosin-7-O- $\beta$ -D-glucoside                                                                     | C22H22O10 | 445.1128 |
| 40 | 4-7-Dihydroxyisoflavone                                                                                 | C15H10O4  | 253.0498 |
| 41 | 7-3-dihydroxy-8-4-dimethoxyisoflavone                                                                   | C17H14O6  | 313.0708 |
| 42 | Afromosin                                                                                               | C17H14O5  | 297.0759 |
| 43 | $\alpha$ -Glucosylnaringin                                                                              | C27H32O14 | 579.1704 |
| 44 | BiochaninA                                                                                              | C16H12O5  | 283.0603 |
| 45 | Apigenin                                                                                                | C15H10O5  | 269.0447 |
| 46 | Astragalin                                                                                              | C21H20O11 | 447.0921 |
| 47 | Astraisoflavanin                                                                                        | C23H28O10 | 463.1596 |
| 48 | Calycosin-7-O-glucoside                                                                                 | C22H22O10 | 445.1128 |
| 49 | Luteolin-7-O-[(6"-caffeoyl)- $\beta$ -D-glucopyranosyl-(1 $\rightarrow$ 6)]- $\beta$ -D-glucopyranoside | C36H36O19 | 771.1761 |
| 50 | Luteolin-7-O-D-gentibioside                                                                             | C37H38O18 | 769.1968 |





Table S2 The compound information used in establishing the PMDF window  
for saponins in SFI

| No. | Identification         | Formula                                         | <i>m/z</i> [M-H] <sup>-</sup> (Da) |
|-----|------------------------|-------------------------------------------------|------------------------------------|
| 1   | Agroastragaloside I    | C <sub>43</sub> H <sub>74</sub> O <sub>16</sub> | 870.0595                           |
| 2   | Agroastragaloside II   | C <sub>43</sub> H <sub>72</sub> O <sub>15</sub> | 828.0228                           |
| 3   | Cyclocanthoside E      | C <sub>41</sub> H <sub>70</sub> O <sub>14</sub> | 785.9861                           |
| 4   | Astragaloside I        | C <sub>43</sub> H <sub>72</sub> O <sub>16</sub> | 868.0436                           |
| 5   | Astragaloside II       | C <sub>43</sub> H <sub>70</sub> O <sub>15</sub> | 826.0069                           |
| 6   | Astragaloside III      | C <sub>41</sub> H <sub>68</sub> O <sub>14</sub> | 783.9702                           |
| 7   | Astragaloside IV       | C <sub>41</sub> H <sub>68</sub> O <sub>14</sub> | 783.9702                           |
| 8   | Astragaloside V        | C <sub>47</sub> H <sub>78</sub> O <sub>16</sub> | 898.1126                           |
| 9   | Astragaloside VI       | C <sub>47</sub> H <sub>78</sub> O <sub>16</sub> | 898.1126                           |
| 10  | Astragaloside VII      | C <sub>47</sub> H <sub>78</sub> O <sub>16</sub> | 898.1126                           |
| 11  | Astragaloside A        | C <sub>41</sub> H <sub>68</sub> O <sub>14</sub> | 783.9702                           |
| 12  | Astramembranin 2       | C <sub>35</sub> H <sub>58</sub> O <sub>9</sub>  | 621.8296                           |
| 13  | Cyclosieversigenin     | C <sub>30</sub> H <sub>50</sub> O <sub>5</sub>  | 489.7150                           |
| 14  | Agroastragaloside III  | C <sub>51</sub> H <sub>82</sub> O <sub>21</sub> | 1030.1842                          |
| 15  | Agroastragaloside IV   | C <sub>49</sub> H <sub>80</sub> O <sub>20</sub> | 988.1475                           |
| 16  | Brachyoside B          | C <sub>36</sub> H <sub>60</sub> O <sub>10</sub> | 651.8556                           |
| 17  | Cycloastragenol        | C <sub>30</sub> H <sub>50</sub> O <sub>5</sub>  | 489.7150                           |
| 18  | Astrasieversianin 8    | C <sub>43</sub> H <sub>70</sub> O <sub>15</sub> | 826.0069                           |
| 19  | Astramembranoside A    | C <sub>42</sub> H <sub>70</sub> O <sub>15</sub> | 813.9962                           |
| 20  | Isoastragaloside 1     | C <sub>43</sub> H <sub>72</sub> O <sub>16</sub> | 868.0436                           |
| 21  | Isoastragaloside 2     | C <sub>43</sub> H <sub>70</sub> O <sub>15</sub> | 826.0069                           |
| 22  | Isoastragaloside 4     | C <sub>41</sub> H <sub>68</sub> O <sub>14</sub> | 783.9702                           |
| 23  | Huangqiyein D          | C <sub>38</sub> H <sub>62</sub> O <sub>11</sub> | 693.8923                           |
| 24  | Malonylastragaloside 1 | C <sub>48</sub> H <sub>74</sub> O <sub>19</sub> | 954.0898                           |
| 25  | Astragaloside VIII     | C <sub>47</sub> H <sub>76</sub> O <sub>17</sub> | 912.0961                           |
| 26  | Azukisaponin V         | C <sub>48</sub> H <sub>78</sub> O <sub>18</sub> | 942.1221                           |
| 27  | Soyasaponin 1          | C <sub>48</sub> H <sub>78</sub> O <sub>18</sub> | 942.1221                           |
| 28  | Soyasaponin 2          | C <sub>47</sub> H <sub>76</sub> O <sub>17</sub> | 912.0961                           |
| 29  | Cyclounifolioside C    | C <sub>36</sub> H <sub>62</sub> O <sub>10</sub> | 653.8715                           |
| 30  | Astramembranoside B    | C <sub>41</sub> H <sub>70</sub> O <sub>14</sub> | 785.9861                           |
| 31  | Cyclocephaloside       | C <sub>41</sub> H <sub>68</sub> O <sub>14</sub> | 783.9702                           |
| 32  | Huangqiyein A          | C <sub>36</sub> H <sub>58</sub> O <sub>10</sub> | 649.8397                           |
| 33  | Huangqiyein B          | C <sub>36</sub> H <sub>60</sub> O <sub>10</sub> | 651.8556                           |
| 34  | Huangqiyein E          | C <sub>42</sub> H <sub>66</sub> O <sub>14</sub> | 793.9650                           |
| 35  | Huangqiyein F          | C <sub>40</sub> H <sub>64</sub> O <sub>12</sub> | 735.9290                           |
| 36  | Mongholicoside 1       | C <sub>36</sub> H <sub>62</sub> O <sub>11</sub> | 669.8709                           |
| 37  | Mongholicoside 2       | C <sub>36</sub> H <sub>62</sub> O <sub>11</sub> | 669.8709                           |
| 38  | Methylnissolin         | C <sub>17</sub> H <sub>16</sub> O <sub>5</sub>  | 299.3059                           |
| 39  | Licoagroside D         | C <sub>22</sub> H <sub>24</sub> O <sub>10</sub> | 447.4200                           |

|    |                                                                                                                                                   |                                                 |           |
|----|---------------------------------------------------------------------------------------------------------------------------------------------------|-------------------------------------------------|-----------|
| 40 | Daucosterol                                                                                                                                       | C <sub>35</sub> H <sub>60</sub> O <sub>6</sub>  | 575.8473  |
| 41 | $\beta$ -sitosterol                                                                                                                               | C <sub>29</sub> H <sub>50</sub> O               | 413.7067  |
| 42 | Sitosterol                                                                                                                                        | C <sub>29</sub> H <sub>50</sub> O               | 413.7067  |
| 43 | Stigmast5en3ol                                                                                                                                    | C <sub>29</sub> H <sub>50</sub> O               | 413.7067  |
| 44 | Lariciresinol                                                                                                                                     | C <sub>20</sub> H <sub>24</sub> O <sub>6</sub>  | 359.4010  |
| 45 | Lupenone                                                                                                                                          | C <sub>30</sub> H <sub>48</sub> O               | 423.7015  |
| 46 | Lupeol                                                                                                                                            | C <sub>30</sub> H <sub>50</sub> O               | 425.7174  |
| 47 | Medicarpin                                                                                                                                        | C <sub>16</sub> H <sub>14</sub> O <sub>4</sub>  | 269.2800  |
| 48 | (3 $\beta$ ,6 $\alpha$ ,16 $\beta$ ,20R,24S)-3-[(3,4-di-O-acetyl- $\beta$ -Dxylopyranosyl)oxy]-20,24-epoxy-16,25-dihydroxy-9,19-cyclolanostan-6-y | C <sub>45</sub> H <sub>71</sub> O <sub>16</sub> | 866.4748  |
| 49 | Astraisoflavan-7-O- $\beta$ -D-glucoside                                                                                                          | C <sub>23</sub> H <sub>27</sub> O <sub>10</sub> | 462.1604  |
| 50 | Odoratin-7-O- $\beta$ -D-glucoside                                                                                                                | C <sub>23</sub> H <sub>23</sub> O <sub>11</sub> | 474.1251  |
| 51 | Astraisoflavan-7-O- $\beta$ -D-glucosid                                                                                                           | C <sub>23</sub> H <sub>27</sub> O <sub>10</sub> | 462.1604  |
| 52 | 5'-hydroxyisomucronulatol-2',5'-di-O-glucoside                                                                                                    | C <sub>29</sub> H <sub>37</sub> O <sub>16</sub> | 640.2093  |
| 53 | Complanatuside                                                                                                                                    | C <sub>28</sub> H <sub>31</sub> O <sub>16</sub> | 622.1623  |
| 54 | Astraisoflavan-7-O- $\beta$ -D-glucoside                                                                                                          | C <sub>23</sub> H <sub>29</sub> O <sub>10</sub> | 464.1761  |
| 55 | Isomer of Complanatuside                                                                                                                          | C <sub>28</sub> H <sub>31</sub> O <sub>16</sub> | 622.1623  |
| 56 | Isomer of Astraisoflavan-7-O- $\beta$ -D-glucoside                                                                                                | C <sub>23</sub> H <sub>27</sub> O <sub>10</sub> | 462.1604  |
| 57 | Kaempferol-4'-methylether-3-D-glucoside                                                                                                           | C <sub>22</sub> H <sub>21</sub> O <sub>11</sub> | 460.1095  |
| 58 | Isomer of Kaempferol-4'-methylether-3-D-glucoside                                                                                                 | C <sub>22</sub> H <sub>21</sub> O <sub>11</sub> | 460.1095  |
| 59 | Isomer of Soyasaponin 1                                                                                                                           | C <sub>48</sub> H <sub>78</sub> O <sub>18</sub> | 942.1221  |
| 60 | Isomer of Astragaloside II                                                                                                                        | C <sub>43</sub> H <sub>70</sub> O <sub>15</sub> | 826.0069  |
| 61 | Mongholicoside II                                                                                                                                 | C <sub>38</sub> H <sub>63</sub> O <sub>11</sub> | 694.4370  |
| 62 | Isomer of Mongholicoside II                                                                                                                       | C <sub>38</sub> H <sub>63</sub> O <sub>11</sub> | 694.4370  |
| 63 | Azukisaponin V methyl ester                                                                                                                       | C <sub>49</sub> H <sub>81</sub> O <sub>18</sub> | 956.5423  |
| 64 | Cyclocanthoside E                                                                                                                                 | C <sub>41</sub> H <sub>69</sub> O <sub>14</sub> | 784.4698  |
| 65 | Ismoer of Cyclocanthoside E                                                                                                                       | C <sub>41</sub> H <sub>69</sub> O <sub>14</sub> | 784.4698  |
| 66 | Isomer of Mongholicoside 2                                                                                                                        | C <sub>47</sub> H <sub>76</sub> O <sub>17</sub> | 912.0961  |
| 67 | Isomer of Mongholicoside 1                                                                                                                        | C <sub>48</sub> H <sub>78</sub> O <sub>18</sub> | 942.1221  |
| 68 | Isomer of Agroastragaloside IV                                                                                                                    | C <sub>41</sub> H <sub>68</sub> O <sub>14</sub> | 783.9702  |
| 69 | Isomer of Isoastragaloside 1                                                                                                                      | C <sub>43</sub> H <sub>72</sub> O <sub>16</sub> | 868.0436  |
| 70 | Isomer of Huangqiyenin E                                                                                                                          | C <sub>42</sub> H <sub>66</sub> O <sub>14</sub> | 793.9650  |
| 71 | Isomer of Huangqiyenin A                                                                                                                          | C <sub>36</sub> H <sub>58</sub> O <sub>10</sub> | 649.8397  |
| 72 | Isomer of Cyclocanthoside E                                                                                                                       | C <sub>41</sub> H <sub>70</sub> O <sub>14</sub> | 785.9861  |
| 73 | Isomer of Licoagroside D                                                                                                                          | C <sub>22</sub> H <sub>24</sub> O <sub>10</sub> | 447.4200  |
| 74 | Isomer of Brachyoside B                                                                                                                           | C <sub>36</sub> H <sub>60</sub> O <sub>10</sub> | 651.8556  |
| 75 | Isomer of Huangqiyenin D                                                                                                                          | C <sub>38</sub> H <sub>62</sub> O <sub>11</sub> | 693.8923  |
| 76 | Isomer of Isoastragaloside 4                                                                                                                      | C <sub>41</sub> H <sub>68</sub> O <sub>14</sub> | 783.9702  |
| 77 | Isomer of Agroastragaloside III                                                                                                                   | C <sub>51</sub> H <sub>82</sub> O <sub>21</sub> | 1030.1842 |
| 78 | Isomer of Cyclosieversigenin                                                                                                                      | C <sub>30</sub> H <sub>50</sub> O <sub>5</sub>  | 489.7150  |
| 79 | Isomer of Astramembranin 2                                                                                                                        | C <sub>35</sub> H <sub>58</sub> O <sub>9</sub>  | 620.8296  |

Table S3 The compound information used in establishing the PMDF window  
for alkaloids in SFI

| No. | Identification                                             | Formula    | <i>m/z</i> [M-H] <sup>+</sup> (Da) |
|-----|------------------------------------------------------------|------------|------------------------------------|
| 1   | Codonopyrrolidium A                                        | C19H28NO4  | 335.2095                           |
| 2   | Codonopyrrolidium B                                        | C14H22NO4  | 269.1626                           |
| 3   | Codonopsine                                                | C14H19NO4  | 266.1391                           |
| 4   | Codonopsinine                                              | C13H17NO3  | 236.1286                           |
| 5   | Codotubulosine A                                           | C18H26NO6  | 353.1837                           |
| 6   | Codotubulosine B                                           | C14H22NO4  | 269.1626                           |
| 7   | Adenosine                                                  | C10H13N5O4 | 268.1045                           |
| 8   | Hypoxanthine                                               | C5H4N4O    | 137.0463                           |
| 9   | 6-Methoxy-quinoline-4-carbaldehyde                         | C11H9NO2   | 188.0711                           |
| 10  | Perlolyrine                                                | C16H12N2O2 | 265.0976                           |
| 11  | N-9-formyl Harman                                          | C45H35N9O6 | 798.2786                           |
| 12  | 1-Carbomethylcarboline                                     | C45H35N9O7 | 814.2736                           |
| 13  | Norharman                                                  | C43H33N9O5 | 756.2681                           |
| 14  | Nicotine                                                   | C10H14N2   | 163.1234                           |
| 15  | Uracil                                                     | C4H4N2O2   | 113.0351                           |
| 16  | 6-Methoxy-4-formyl quinolone                               | C11H9NO2   | 188.0711                           |
| 17  | 1, 2, 3,4-Tetrahydro- $\beta$ -carboline-3-carboxylic acid | C12H14N2O2 | 219.1133                           |
| 18  | Tryptophan                                                 | C11H12N2O2 | 205.0976                           |
| 19  | Astragaline A                                              | C10H11NO4  | 210.0766                           |
| 20  | Astragaline D                                              | C12H15NO5  | 254.1028                           |
| 21  | Astrafaline E                                              | C14H16N2O5 | 293.1137                           |
| 22  | Astrafaline F                                              | C12H18N2O5 | 271.1293                           |
| 23  | Hypaphorine                                                | C14H18N2O2 | 247.1445                           |
| 24  | 1-(1H-Pyrrol-2-yl) ethenone                                | C6H7NO     | 110.0605                           |
| 25  | HDTIC-1                                                    | C12H15NO5  | 254.1028                           |
| 26  | HDTIC-2                                                    | C12H15NO5  | 240.0997                           |
| 27  | Uridine                                                    | C9H12N2O6  | 245.0773                           |
| 28  | Adenosine                                                  | C10H13N5O4 | 268.1045                           |
| 29  | Codonopiloside A                                           | C19H29O9N  | 416.1908                           |
| 30  | Codonopyrrolidium A                                        | C19H27O5N  | 350.1952                           |

Table S4 The compound information used in establishing the PMDF window  
for polyene and polyethylene components in SFI

| No. | Identification                                                                          | Formula   | <i>m/z</i> [M-H] <sup>+</sup> (Da) |
|-----|-----------------------------------------------------------------------------------------|-----------|------------------------------------|
| 1   | Lobetyol                                                                                | C14H18O3  | 233.1177                           |
| 2   | Lobetyolin                                                                              | C20H29O9  | 412.1732                           |
| 3   | Lobetyolinin                                                                            | C26H38O13 | 557.2232                           |
| 4   | Pilosulyne A                                                                            | C14H20O4  | 251.1282                           |
| 5   | Pilosulyne B                                                                            | C14H18O4  | 249.1126                           |
| 6   | Pilosulyne C                                                                            | C14H20O3  | 235.1333                           |
| 7   | Pilosulyne D                                                                            | C20H28O8  | 395.1705                           |
| 8   | Pilosulyne E                                                                            | C26H28O13 | 547.1450                           |
| 9   | Pilosulyne F                                                                            | C14H20O4  | 251.1282                           |
| 10  | Cordifolioidyne A                                                                       | C16H20O6  | 307.1181                           |
| 11  | Cordifolioidyne B                                                                       | C16H20O4  | 275.1282                           |
| 12  | Cordifolioidyne C                                                                       | C20H28O8  | 395.1705                           |
| 13  | Codonopilodiyne A                                                                       | C20H28O8  | 395.1705                           |
| 14  | Codonopilodiyne C                                                                       | C26H40O15 | 591.2287                           |
| 15  | Codonopilodiyne B                                                                       | C26H40O15 | 591.2287                           |
| 16  | Codonopilodiyne D                                                                       | C20H30O8  | 397.1861                           |
| 17  | Codonopilodiyne E                                                                       | C26H40O12 | 543.2440                           |
| 18  | Codonopilodiyne F                                                                       | C26H38O12 | 541.2283                           |
| 19  | Codonopilodiyne G                                                                       | C26H38O12 | 541.2283                           |
| 20  | Codonopilodiyne H                                                                       | C20H27O8  | 394.1626                           |
| 21  | Pratinalin B                                                                            | C32H48O18 | 719.2760                           |
| 22  | Codonopilodiyne L                                                                       | C20H28O9  | 411.1654                           |
| 23  | Codonopilodiyne M                                                                       | C20H28O9  | 411.1654                           |
| 24  | Codonopiloenyne A                                                                       | C20H30O9  | 413.1810                           |
| 25  | Tetradeca-(4 <i>E</i> ,8 <i>E</i> ,12 <i>E</i> )-triene-10-yne-1,6,7-triol              | C14H20O3  | 235.1333                           |
| 26  | Codonopiloenyne B                                                                       | C22H36O10 | 459.2228                           |
| 27  | (+)-(6 <i>R</i> ,7 <i>R</i> ,12 <i>E</i> )-Tetradeca-12-en-10-yne-1,6,7-triol           | C14H24O3  | 239.1646                           |
| 28  | (2 <i>E</i> ,6 <i>E</i> )-Octa-2,6-dien-4-ynoic acid                                    | C8H8O2    | 135.0446                           |
| 29  | ( <i>E</i> )-Oct-6-en-4-ynoic acid                                                      | C8H10O2   | 137.0602                           |
| 30  | (+)-(2 <i>R</i> ,7 <i>S</i> )-1,7-Dihydroxy-2,7-cyclotetradeca-4,8,12-trien-10-yn-6-one | C14H16O3  | 231.1020                           |
| 31  | 9-(tetrahydropyran-2-yl)-non-trans-2,8-diene-4,6-diyne-1-ol                             | C14H16O2  | 215.1071                           |

|    |                                                        |           |          |
|----|--------------------------------------------------------|-----------|----------|
| 32 | 9-(tetrahydropyran-2-yl)-non-trans-8-ene-4,6-diyn-1-ol | C14H18O2  | 217.1228 |
| 33 | Pilosulinene A                                         | C14H12O2  | 211.0758 |
| 34 | Pilosulinol A                                          | C22H28O7  | 403.1755 |
| 35 | Pilosulinol B                                          | C22H28O7  | 403.1755 |
| 36 | Tangshenyne A                                          | C20H28O10 | 427.1603 |
| 37 | Choushenpilosulyne                                     | C30H48O4  | 471.3472 |
| 38 | Choushenpilosulyne A                                   | C37H58O9  | 645.4000 |
| 39 | Choushenpilosulyne B                                   | C37H58O9  | 645.4000 |

---

Table S5 Detailed information about the characterized compounds in SFI

| NO | Type       | tR (min) | Identification                                    | Formula   | RDB  | Error (ppm) | [M+H] <sup>+</sup> | [M+Na] <sup>+</sup> | [M-H]    | [M+CHOO] <sup>+</sup> | Major fragment ions                                          | CCS<br>(angstrom <sup>2</sup> ) | Source         |
|----|------------|----------|---------------------------------------------------|-----------|------|-------------|--------------------|---------------------|----------|-----------------------|--------------------------------------------------------------|---------------------------------|----------------|
| 1  | Flavonoids | 3.66     | Complanatuside                                    | C28H32O16 | 12.5 | -2.02       |                    |                     | 623.1606 | 669.1661              | [M-H] <sup>+</sup> : 461.11, 299.06, 151.04                  | 230.06                          | As, Co         |
| 2  |            | 5.62     | Kaempferol-3-O-sophoroside                        | C27H30O16 | 12.5 | -1.72       |                    |                     | 609.1450 |                       | [M-H] <sup>+</sup> : 447.09, 327.05, 285.04, 193.05          | 227.92                          | As, Co         |
| 3  |            | 5.72     | Astragaloside                                     | C28H32O17 | 13.5 | 0.67        |                    |                     | 639.1571 | 685.1616              | [M-H] <sup>+</sup> : 579.18, 477.13, 447.11, 315.05          | 236.72                          | As, SF1        |
| 4  |            | 7.81     | Unknown                                           | C37H52O20 | 12.5 | -1.00       |                    |                     | 815.2966 | 861.3030              | [M-H] <sup>+</sup> : 653.24, 521.20, 461.11                  | 258.30                          | As, SF1        |
| 5  |            | 8.68     | Emodin-di-Glucoside                               | C27H30O15 | 13.5 | -2.58       |                    |                     | 593.1497 |                       | [M-H] <sup>+</sup> : 575.14, 503.12, 473.11, 383.08, 353.07  | 246.21                          | As, SF1        |
| 6  |            | 10.50    | Pratensein-7-O- $\beta$ -D-glucopyranoside        | C22H22O11 | 12.5 | -1.55       |                    |                     | 461.1108 |                       | [M-H] <sup>+</sup> : 299.06, 284.03, 266.02                  | 204.58                          | As, Co,<br>SF1 |
| 7  |            | 10.88    | Prunin                                            | C21H22O10 | 11.5 | -1.06       |                    |                     | 433.1136 |                       | [M-H] <sup>+</sup> : 271.06, 256.02, 193.05, 135.00          | 177.80                          | As, Co         |
| 8  |            | 11.54    | Unknown                                           | C33H44O17 | 12.5 | -1.24       |                    |                     | 711.2497 | 757.2550              | [M-H] <sup>+</sup> : 531.19, 369.13, 263.24, 243.15          | 245.29                          | As, SF1        |
| 9  |            | 11.68    | Tangshenoside I                                   | C29H42O18 | 9.5  | -1.68       |                    |                     | 677.2287 |                       | [M-H] <sup>+</sup> : 523.23, 497.16, 453.18, 261.10          | 236.52                          | Co             |
| 10 |            | 13.05    | Unknown                                           | C31H42O15 | 11.5 | -1.92       |                    |                     | 653.2438 | 699.2493              | [M-H] <sup>+</sup> : 491.19, 329.14, 315.12, 311.13          | 232.10                          | As, SF1        |
| 11 |            | 13.72    | Unknown                                           | C28H32O15 | 13.5 | 0.85        |                    |                     | 607.1668 | 653.1725              | [M-H] <sup>+</sup> : 329.15, 283.06, 268.04                  | 232.10                          | As, SF1        |
| 12 |            | 13.78    | Astragalin                                        | C22H24O10 | 11.5 | -0.15       |                    |                     | 447.0879 |                       | [M-H] <sup>+</sup> : 285.04, 255.03, 193.05                  | 198.00                          | As, Co,<br>SF1 |
| 13 |            | 13.96    | Isomucronulatol-2',5'-di-O-glucoside              | C28H34O16 | 12.5 | -0.89       |                    |                     | 641.1718 |                       | [M-H] <sup>+</sup> : 479.12, 317.07, 251.03, 191.03          | 250.35                          | As, Co,<br>SF1 |
| 14 |            | 14.78    | Calycosin-7-O- $\beta$ -D-glucopyranoside         | C22H22O10 | 11.5 | -2.47       |                    |                     | 445.1130 | 491.1198              | [M-H] <sup>+</sup> : 283.07, 268.08, 207.05                  | 224.57                          | As, SF1        |
| 15 |            | 15.08    | Unknown                                           | C31H42O15 | 11.5 | -1.46       |                    |                     | 653.2441 | 699.2493              | [M-H] <sup>+</sup> : 491.19, 329.14, 315.12, 311.13          | 225.32                          | As, SF1        |
| 16 |            | 15.89    | Kumatakenin                                       | C17H14O7  | 11.5 | -0.93       |                    |                     | 313.0715 |                       | [M-H] <sup>+</sup> : 298.05, 283.02, 255.03, 233.06, 193.05  | 172.98                          | SF1            |
| 17 |            | 16.20    | Kumatakenin+2Glc                                  | C29H34O16 | 13.5 | -2.27       |                    |                     | 637.1760 | 683.2500              | [M-H] <sup>+</sup> : 475.12, 313.07, 255.07                  | 227.70                          | As, SF1        |
| 18 |            | 16.57    | 6'-O-Acetycalycosin-7-O- $\beta$ -D-glucoside+Glc | C28H42O17 | 8.5  | 1.69        |                    |                     | 649.2355 | 695.2407              | [M-H] <sup>+</sup> : 487.18, 469.17, 353.11, 293.09, 179.06  | 259.40                          | As, SF1        |
| 19 |            | 17.04    | Neohesperidin                                     | C28H36O15 | 11.5 | -1.23       |                    |                     | 611.1974 |                       | [M-H] <sup>+</sup> : 449.15, 287.09, 272.06, 255.07, 165.06, | 227.90                          | As, SF1        |

|    |       |                                             |           |      |       |          |          |                                                                             |        |         |
|----|-------|---------------------------------------------|-----------|------|-------|----------|----------|-----------------------------------------------------------------------------|--------|---------|
|    |       |                                             |           |      |       |          |          | 135.05, 121.03                                                              |        |         |
| 20 | 17.66 | Apigenin 7-glucoside                        | C21H20O10 | 12.5 | -1.16 | 431.0979 | 477.1033 | [M-H] <sup>+</sup> : 269.05, 225.10, 199.40                                 | 207.25 | As, Co  |
| 21 | 19.30 | Lobetyolinin                                | C26H38O13 | 8.5  | 0.06  | 557.2240 | 603.2294 | [M-H] <sup>+</sup> : 539.21, 467.18, 323.10                                 | 246.12 | Co.SF1  |
| 22 | 19.31 | 8,2'-Dihydroxy-7,4'-dimethoxyisoflavan      | C17H18O6  | 9.5  | -2.72 | 317.1022 |          | [M-H] <sup>+</sup> : 267.08, 241.05, 193.05, 137.02, 121.03                 | 170.95 | As, SF1 |
| 23 | 20.38 | Unknown                                     | C30H36O17 | 13.5 | -0.44 | 667.1877 |          | [M-H] <sup>+</sup> : 505.20, 417.18, 402.17, 329.14, 166.03                 | 238.79 | As, SF1 |
| 24 | 21.46 | Sissotrin                                   | C22H22O10 | 12.5 | -3.63 | 445.1133 |          | [M-H] <sup>+</sup> : 283.06, 253.05, 239.04                                 | 200.28 | As, SF1 |
| 25 | 22.03 | Unknown                                     | C29H38O15 | 11.5 | 1.29  | 625.2146 | 671.2202 | [M-H] <sup>+</sup> : 463.16, 301.11, 286.08, 269.05, 146.06                 | 230.05 | As, SF1 |
| 26 | 22.22 | Naringenin7Rhamnoglucoside                  | C27H32O14 | 12.5 | 1.59  | 579.1723 | 625.2141 | [M-H] <sup>+</sup> : 459.11, 313.07, 271.06, 235.02, 151.00                 | 212.37 | As, Co  |
| 27 | 22.79 | Odoratin-7-O-Glc                            | C23H26O11 | 11.5 | -1.10 | 477.1397 |          | [M-H] <sup>+</sup> : 401.14, 386.13, 355.04, 178.03                         | 213.42 | As, SF1 |
| 28 | 23.17 | 6-Methoxyflavanone                          | C16H14O3  | 10.5 | -1.80 | 285.0758 |          | [M-H] <sup>+</sup> : 267.09, 233.06, 193.05, 149.06                         | 158.22 | As, SF1 |
| 29 | 23.88 | Isomer of 33                                | C28H34O15 | 12.5 | -2.21 | 609.1812 |          | [M-H] <sup>+</sup> : 301.07, 286.05, 257.08, 242.06                         | 239.25 | As, Co  |
| 30 | 23.91 | 6'-O-Acetycalycosin-7-O-β-D-glucoside       | C24H24O11 | 13.5 | 1.22  | 487.1252 | 533.1310 | [M-H] <sup>+</sup> : 325.07, 283.06, 268.04, 239.04                         | 219.30 | As, SF1 |
| 31 | 25.87 | Isomer of 30                                | C28H34O15 | 12.5 | -1.11 | 609.1818 |          | [M-H] <sup>+</sup> : 447.13, 301.11, 286.05, 257.08                         | 223.40 | As, Co  |
| 32 | 28.85 | Ononin                                      | C22H22O9  | 11.5 | -1.46 | 429.1187 | 475.1244 | [M-H] <sup>+</sup> : 269.08, 253.05, 225.05                                 | 220.24 | As, Co  |
| 33 | 29.21 | 6'-O-Acetycalycosin-7-O-β-D-glucoside       | C24H24O11 | 13.5 | -0.71 | 487.1249 | 533.1309 | [M-H] <sup>+</sup> : 325.07, 297.08, 283.06, 268.01                         | 224.62 | As, Co  |
| 34 | 30.22 | Afrormosin                                  | C17H14O5  | 11.5 | -2.18 | 297.0762 |          | [M-H] <sup>+</sup> : 267.06, 233.06, 193.05                                 | 164.66 | As, SF1 |
| 35 | 30.53 | Trihydroxy-dimethoxy dihydroisoflavone      | C22H24O12 | 11.5 | -0.11 | 479.1189 |          | [M-H] <sup>+</sup> : 461.13, 317.13, 273.05, 255.05                         | 206.62 | As, SF1 |
| 36 | 32.27 | Calycosin derivative                        | C28H34O14 | 12.5 | -0.23 | 593.1874 | 639.1928 | [M-H] <sup>+</sup> : 299.06, 284.07, 269.05                                 | 266.34 | As, SF1 |
| 37 | 32.51 | 3-O-Methylorobol/Calycosin                  | C16H12O6  | 11.5 | 3.30  | 299.0560 |          | [M-H] <sup>+</sup> : 284.05, 256.03, 227.03, 135.04                         | 166.86 | As, SF1 |
| 38 | 32.63 | 287.09+Glu                                  | C22H26O10 | 10.5 | -1.20 | 449.1448 | 495.1656 | [M-H] <sup>+</sup> : 287.09, 272.07, 255.07, 165.06, 135.04, 121.03, 109.03 | 202.48 | As, SF1 |
| 39 | 32.65 | Isomucronulatol derivative                  | C16H16O5  | 9.5  | -4.87 | 287.0932 |          | [M-H] <sup>+</sup> : 267.06, 223.06, 149.02                                 | 162.66 | As, SF1 |
| 40 | 33.55 | 9,10-Dimethoxypterocarpan-3-O-β-D-glucoside | C23H26O10 | 10.5 | -1.43 | 461.1453 | 507.1510 | [M-H] <sup>+</sup> : 301.11, 271.06, 197.06, 167.07                         | 228.92 | As, SF1 |
| 41 | 33.69 | Astrapterocarpan-7-O-β-D-glucopyranoside    | C23H26O10 | 11.5 | -1.26 | 461.1447 | 507.1500 | [M-H] <sup>+</sup> : 461.14, 299.09, 284.07, 235.24                         | 228.92 | As, SF1 |
| 42 | 34.10 | Vesticarpan derivative                      | C17H16O7  | 9.5  | -0.94 | 331.1184 |          | [M-H] <sup>+</sup> : 301.11, 267.06, 223.06, 193.05                         | 177.40 | As, SF1 |
| 43 | 34.19 | 301+Glc+Api                                 | C28H36O14 | 11.5 | -1.09 | 595.2026 |          | [M-H] <sup>+</sup> : 463.16, 301.11, 286.08, 271.06, 179.07                 | 228.03 | As, SF1 |



|    |       |                                                        |           |      |       |          |          |                                                                                 |        |                 |
|----|-------|--------------------------------------------------------|-----------|------|-------|----------|----------|---------------------------------------------------------------------------------|--------|-----------------|
| 44 | 36.10 | Calycosin                                              | C16H12O5  | 11.5 | 1.60  | 283.0616 |          | [M-H] <sup>+</sup> : 268.05, 239.04, 211.04, 195.05, 183.05,<br>135.01          | 162.76 | As, Co,<br>SF1  |
| 45 | 36.20 | Unknown                                                | C24H30O11 | 10.5 | -0.48 | 493.1713 |          | [M-H] <sup>+</sup> : 463.16, 301.11, 286.08, 147.05                             | 213.25 | As, Co          |
| 46 | 36.67 | 7,2'-Dihydroxy-3', 4'-dimethoxyisoflavan               | C17H18O5  | 9.5  | -1.70 | 301.1071 |          | [M-H] <sup>+</sup> : 286.08, 223.06, 193.05, 179.07, 149.02,<br>121.03          | 166.81 | As, Co, SF<br>1 |
| 47 | 36.72 | Isomucronulatol-7-O-glucoside                          | C23H28O10 | 10.5 | 0.35  | 463.1611 | 509.1663 | [M-H] <sup>+</sup> : 301.11, 286.09, 271.06, 147.04                             | 215.86 | As, Co,<br>SF1  |
| 48 | 36.77 | Neocomplanoside+2H                                     | C25H30O11 | 11.5 | 2.60  | 505.1723 | 551.1780 | [M-H] <sup>+</sup> : 445.15, 301.11, 286.08, 135.05                             | 214.88 | As, Co,<br>SF1  |
| 49 | 38.80 | Unknown                                                | C28H34O15 | 12.5 | -2.21 | 609.1812 |          | [M-H] <sup>+</sup> : 301.07, 286.05, 257.08, 242.06                             | 223.41 | As, Co          |
| 50 | 41.27 | 9,10-Dimethoxypterocarpan-3-O-malonyl-Glc              | C25H28O11 | 12.5 | 2.49  | 503.1566 | 549.1623 | [M-H] <sup>+</sup> : 486.30, 299.09, 284.07, 269.05                             | 217.63 | As, SF1         |
| 51 | 43.54 | 9,10-Dimethoxypterocarpan-3-O-malonyl-Glc+2H           | C25H30O11 | 11.5 | 1.16  | 505.1724 | 551.1771 | [M-H] <sup>+</sup> : 445.15, 343.12, 301.11, 286.08, 179.07                     | 224.41 | As, Co,<br>SF1  |
| 52 | 44.35 | Unknown                                                | C30H36O15 | 13.5 | -2.45 | 635.1966 |          | [M-H] <sup>+</sup> : 593.19, 575.18, 299.09, 284.07, 269.05                     | 254.95 | As, SF1         |
| 53 | 44.73 | Dihydroxy-dimethoxy dihydroisoflavone                  | C17H16O6  | 10.5 | 1.32  | 315.0873 |          | [M-H] <sup>+</sup> : 215.13, 195.05                                             | 176.62 | As, SF1         |
| 54 | 44.77 | Formononetin-7-O-Glc-6"-O-acetate derivative           | C25H26O12 | 13.5 | -0.39 | 517.1350 |          | [M-H] <sup>+</sup> : 267.07, 252.04, 223.04, 195.05                             | 214.78 | As, SF1         |
| 55 | 44.82 | 6"-O-acetyl-ononin                                     | C24H24O10 | 13.5 | -0.05 | 471.1291 | 517.1352 | [M-H] <sup>+</sup> : 449.28, 327.22, 315.09, 267.07                             | 218.02 | As              |
| 56 | 46.71 | Astraisoflavan-malonyl-Glc                             | C26H30O13 | 12.5 | 1.05  | 549.1613 |          | [M-H] <sup>+</sup> : 299.06, 284.05, 267.06                                     | 217.04 | As, SF1         |
| 57 | 48.53 | Isomer of 9,10-Dimethoxypterocarpan-3-O-malonyl-Glc+2H | C25H30O11 | 11.5 | -1.87 | 505.1706 | 551.1759 | [M-H] <sup>+</sup> : 445.15, 343.12, 301.11, 286.08                             | 222.14 | As, Co,<br>SF1  |
| 58 | 51.54 | Formononetin                                           | C16H12O4  | 11.5 | 4.70  | 267.0664 |          | [M-H] <sup>+</sup> : 252.04, 233.05, 195.06, 132.03                             | 156.45 | As, Co,<br>SF1  |
| 59 | 22.97 | Unknown                                                | C54H93O28 | 8.5  | 0.67  | 1189.586 |          | [M-H] <sup>+</sup> : 1019.34, 711.25, 521.67, 493.14, 401.15,<br>270.05, 197.81 | 325.49 | As, Co,<br>SF1  |
| 60 | 24.55 | Unknown                                                | C41H70O15 | 7.5  | -1.17 | 801.4633 | 847.4667 | [M-H] <sup>+</sup> : 639.41, 507.37, 489.36                                     | 272.93 | As, SF1         |
| 61 | 29.62 | Unknown                                                | C41H70O15 | 7.5  | -2.93 | 801.4619 | 847.4667 | [M-H] <sup>+</sup> : 639.41, 507.37, 489.36                                     | 274.34 | As, SF1         |

|    |       |                             |           |      |       |               |           |                                                                                |        |                |
|----|-------|-----------------------------|-----------|------|-------|---------------|-----------|--------------------------------------------------------------------------------|--------|----------------|
| 62 | 30.48 | Unknown                     | C53H92O25 | 8.5  | -1.12 | 1127.583<br>6 | 1173.5896 | [M-H] <sup>-</sup> : 965.53, 819.47, 687.43                                    | 321.08 | As, SF1        |
| 63 | 30.62 | Unknown                     | C42H74O16 | 6.5  | -1.09 | 833.4895      | 879.4949  | [M-H] <sup>-</sup> : 671.40, 509.39, 469.35, 425.30                            | 278.73 | As, SF1        |
| 64 | 37.72 | Bicusposide F               | C37H62O11 | 7.5  | 1.43  | 681.4229      | 727.4281  | [M-H] <sup>-</sup> : 621.40, 603.38, 329.23                                    | 277.44 | As, SF1        |
| 65 | 38.84 | Unknown                     | C42H70O17 | 8.5  | 1.11  | 845.4544      | 891.3503  | [M-H] <sup>-</sup> : 799.45, 637.21, 161.05, 119.03                            | 278.67 | As, SF1        |
| 66 | 40.02 | Unknown                     | C54H88O24 | 11.5 | -0.39 | 1119.558<br>8 |           | [M-H] <sup>-</sup> : 10101.55, 1057.56, 911.50, 587.39,<br>473.37              | 344.23 | As, SF1        |
| 67 | 41.48 | Unknown                     | C42H70O15 | 8.5  | 3.13  | 813.4667      | 859.4700  | [M-H] <sup>-</sup> : 771.32, 577.24, 389.17, 341.18                            | 285.46 | As, SF1        |
| 68 | 42.78 | Unknown                     | C53H88O24 | 10.5 | -1.28 | 1107.557<br>9 | 1153.5638 | [M-H] <sup>-</sup> : 945.50, 783.45, 621.40, 489.36                            | 314.24 | As, Co,<br>SF1 |
| 69 | 43.04 | Unknown                     | C47H82O18 | 7.5  | -0.45 | 933.5424      | 979.5471  | [M-H] <sup>-</sup> : 787.48, 655.44, 493.39                                    | 294.26 | As, SF1        |
| 70 | 43.07 | Unknown                     | C47H76O19 | 10.5 | -0.41 | 943.4904      | 989.4962  | [M-H] <sup>-</sup> : 781.44, 619.39, 487.35                                    | 294.22 | As, Co         |
| 71 | 43.55 | Astragaloside VII           | C47H78O19 | 9.5  | 3.40  | 945.5091      | 991.5159  | [M-H] <sup>-</sup> : 783.45, 621.40, 489.36                                    | 294.21 | As, SF1        |
| 72 | 44.53 | Robinoside E                | C48H78O19 | 10.5 | 1.23  | 957.5076      |           | [M-H] <sup>-</sup> : 939.55, 895.57, 811.50, 649.55, 631.40,<br>473.42, 453.37 | 321.77 | As, SF1        |
| 73 | 44.74 | Unknown                     | C48H80O20 | 9.5  | -3.74 | 975.5134      | 1021.5200 | [M-H] <sup>-</sup> : 813.46, 651.41, 489.36                                    | 314.57 | As, SF1        |
| 74 | 45.16 | Astragaloside VI            | C47H78O19 | 9.5  | -1.40 | 945.5051      | 991.5104  | [M-H] <sup>-</sup> : 783.45, 621.40, 489.36, 471.35, 383.32                    | 317.21 | As, SF1        |
| 75 | 45.91 | Astragaloside V/VI/VII+C2H2 | C48H76O20 | 11.5 | 1.51  | 971.4872      | 1017.4926 | [M-H] <sup>-</sup> : 909.58, 763.52, 645.45, 469.40                            | 324.02 | As, Co,<br>SF1 |
| 76 | 46.08 | Unknown                     | C47H74O19 | 11.5 | -1.68 | 941.4736      |           | [M-H] <sup>-</sup> : 923.46, 879.48, 733.42, 601.37, 439.33                    | 317.23 | As, SF1        |
| 77 | 46.26 | Unknown                     | C47H80O19 | 8.5  | -2.39 | 947.5198      | 993.5301  | [M-H] <sup>-</sup> : 785.47, 623.41, 491.37, 473.37                            | 330.85 | As, SF1        |
| 78 | 46.37 | Unknown                     | C48H76O20 | 11.5 | 0.13  | 971.4858      | 1017.4916 | [M-H] <sup>-</sup> : 909.58, 763.52, 645.44, 469.38                            | 324.02 | As, Co,<br>SF1 |
| 79 | 46.85 | Cyclocanthoside E           | C41H70O14 | 7.5  | -0.52 | 785.4689      | 831.4752  | [M-H] <sup>-</sup> : 623.42, 491.37, 473.33, 415.32, 397.31,<br>323.28         | 267.58 | As, SF1        |
| 80 | 47.25 | Unknown                     | C46H76O18 | 9.5  | -1.98 | 915.4941      | 961.5018  | [M-H] <sup>-</sup> : 829.46, 783.50, 597.46, 403.31                            | 298.73 | As, SF1        |

|     |       |                                |           |      |       |          |           |                                                                                |        |         |
|-----|-------|--------------------------------|-----------|------|-------|----------|-----------|--------------------------------------------------------------------------------|--------|---------|
| 81  | 47.29 | 3-O-rhap-galp-glup-conplogenin | C48H76O19 | 11.5 | -1.55 | 955.4905 | 1001.4964 | [M-H] <sup>+</sup> : 937.43, 893.47, 809.44, 747.42, 629.35,<br>539.34, 471.33 | 321.78 | As, SF1 |
| 82  | 47.49 | Astrasieversianin XIV          | C47H78O18 | 9.5  | 1.76  | 929.5126 | 975.5184  | [M-H] <sup>+</sup> : 829.46, 809.31, 612.30, 480.18                            | 294.28 | As, SF1 |
| 83  | 48.07 | Lancemasides D                 | C52H79O24 | 13.5 | -0.99 | 1087.495 |           | [M-H] <sup>+</sup> : 977.53, 911.44, 831.47, 677.03, 197.81                    | 324.29 | As, SF1 |
| 84  | 48.12 | Astrasieversianin XIV+2H       | C47H80O18 | 8.5  | -2.06 | 931.5253 | 977.5309  | [M-H] <sup>+</sup> : 785.47, 769.47, 623.42, 607.42, 491.38                    | 298.86 | As, SF1 |
| 85  | 48.30 | Isomer of Pardarinoside B      | C42H70O15 | 8.5  | -1.60 | 813.4628 | 859.4689  | [M-H] <sup>+</sup> : 651.41, 489.36, 605.31, 327.22                            | 283.17 | As, SF1 |
| 86  | 48.31 | Pardarinoside B                | C42H70O15 | 8.5  | -3.68 | 813.4612 | 859.4706  | [M-H] <sup>+</sup> : 667.41, 327.22, 309.21                                    | 283.17 | As, SF1 |
| 87  | 48.33 | Sieberoside                    | C42H70O15 | 8.5  | -2.96 | 813.4618 | 859.4679  | [M-H] <sup>+</sup> : 651.41, 489.36, 327.22, 211.11                            | 283.17 | As, SF1 |
| 88  | 48.81 | Unknown                        | C41H70O14 | 7.5  | -0.45 | 785.4689 | 831.4744  | [M-H] <sup>+</sup> : 623.42, 491.37, 311.31                                    | 301.69 | As, SF1 |
| 89  | 48.83 | Astragaloside V/VI/VII+C3H6    | C49H80O20 | 10.5 | -1.04 | 987.5160 | 1033.5222 | [M-H] <sup>+</sup> : 927.50, 765.44, 633.40, 603.39, 489.36                    | 317.01 | As, SF1 |
| 90  | 49.21 | Unknown                        | C66H69O8  | 32.5 | 0.21  | 989.5000 |           | [M-H] <sup>+</sup> : 827.41, 809.43, 393.20, 327.22, 197.81                    | 333.56 | As, SF1 |
| 91  | 49.26 | Unknown                        | C47H76O19 | 10.5 | -0.86 | 943.4901 | 989.4952  | [M-H] <sup>+</sup> : 781.44, 619.38, 487.35                                    | 310.1  | As, SF1 |
| 92  | 49.90 | Astragaloside V                | C47H78O19 | 9.5  | 1.18  | 945.5052 | 991.5140  | [M-H] <sup>+</sup> : 783.45, 621.40, 489.36, 471.35, 383.32                    | 328.55 | As, SF1 |
| 93  | 50.88 | Unknown                        | C48H74O20 | 12.5 | -0.98 | 969.4691 | 1015.4752 | [M-H] <sup>+</sup> : 907.47, 761.41, 599.36, 437.30                            | 321.72 | As, SF1 |
| 94  | 50.88 | Unknown                        | C49H84O20 | 8.5  | -0.29 | 991.5469 | 1037.5536 | [M-H] <sup>+</sup> : 931.53, 785.47, 653.43                                    | 323.53 | As, SF1 |
| 95  | 50.92 | Agroastragaloside II           | C43H72O15 | 8.5  | 4.41  | 827.4835 | 873.4855  | [M-H] <sup>+</sup> : 767.51, 635.43, 605.39, 443.27                            | 292.51 | As, SF1 |
| 96  | 51.25 | Unknown                        | C47H72O19 | 12.5 | -1.65 | 939.4579 |           | [M-H] <sup>+</sup> : 877.46, 731.40, 643.35, 599.39, 485.33                    | 314.93 | As, SF1 |
| 97  | 51.38 | Unknown                        | C42H68O16 | 9.5  | 0.03  | 781.4368 | 827.4435  | [M-H] <sup>+</sup> : 649.43, 619.40, 487.38                                    | 260.77 | As, SF1 |
| 98  | 51.59 | Astragaloside IV               | C41H68O14 | 8.5  | -1.30 | 783.4528 | 829.4576  | [M-H] <sup>+</sup> : 621.40, 489.36, 471.35, 415.29, 383.29,<br>276.62         | 297.1  | As, SF1 |
| 99  | 51.91 | Unknown                        | C49H80O20 | 10.5 | -3.14 | 987.5119 | 1033.5226 | [M-H] <sup>+</sup> : 927.50, 765.44, 633.40, 603.34, 489.35                    | 333    | As, SF1 |
| 100 | 51.70 | Astragaloside III              | C41H68O14 | 8.5  | 2.90  | 783.4559 | 829.4604  | [M-H] <sup>+</sup> : 769.61, 685.51, 651.36, 503.25                            | 297.1  | As, SF1 |
| 101 | 52.08 | Isoastragaloside IV            | C41H68O14 | 8.5  | 4.26  | 783.4564 | 829.4608  | [M-H] <sup>+</sup> : 621.40, 489.36, 383.28                                    | 297.1  | As, SF1 |
| 102 | 52.22 | Unknown                        | C41H70O13 | 7.5  | -1.11 | 769.4735 | 815.4795  | [M-H] <sup>+</sup> : 769.48, 607.42, 475.38, 399.32                            | 290.31 | As, Co  |
| 103 | 52.46 | Unknown                        | C51H82O21 | 11.5 | 2.02  | 1029.529 | 1075.5348 | [M-H] <sup>+</sup> : 969.51, 909.49, 747.46                                    | 328.19 | As, SF1 |

|     |       |                      |           |      |       |          |           |                                                                                |        |                |
|-----|-------|----------------------|-----------|------|-------|----------|-----------|--------------------------------------------------------------------------------|--------|----------------|
| 7   |       |                      |           |      |       |          |           |                                                                                |        |                |
| 104 | 52.61 | Unknown              | C41H68O13 | 8.5  | -2.04 | 767.4572 | 813.4625  | [M-H] <sup>+</sup> : 637.34, 329.23, 311.21, 201.08                            | 267.69 | As, SF1        |
| 105 | 52.95 | Rajanoside           | C43H70O15 | 9.5  | -0.32 | 825.4639 | 871.4705  | [M-H] <sup>+</sup> : 783.46, 765.44, 717.42, 603.41, 489.36                    | 285.64 | As, SF1        |
| 106 | 53.09 | Soyasaponin I        | C48H78O18 | 10.5 | -1.88 | 941.5098 | 987.5147  | [M-H] <sup>+</sup> : 923.51, 795.46, 733.45, 615.40, 597.39,<br>457.37, 437.36 | 335.51 | As, Co,<br>SF1 |
| 107 | 53.39 | Unknown              | C43H68O15 | 10.5 | -1.63 | 823.4472 | 869.4538  | [M-H] <sup>+</sup> : 763.43, 601.37, 469.39                                    | 306.08 | As, SF1        |
| 108 | 53.59 | Astragaloside II     | C44H72O17 | 9.5  | 1.33  | 871.4703 | 917.5026  | [M-H] <sup>+</sup> : 825.48, 765.45, 633.36, 445.06                            | 306.07 | As, SF1        |
| 109 | 53.66 | Cycloaraloside A     | C36H60O10 | 7.5  | -3.94 | 651.4093 | 697.4177  | [M-H] <sup>+</sup> : 489.40, 487.26, 329.23, 171.10                            | 259.03 | As, Co,<br>SF1 |
| 110 | 53.66 | Unknown              | C47H70O16 | 13.5 | 4.37  | 889.4630 | 935.4986  | [M-H] <sup>+</sup> : 869.46, 691.35, 475.29, 329.23                            | 319.76 | As, Co,<br>SF1 |
| 111 | 53.88 | Unknown              | C48H76O19 | 11.5 | 1.39  | 955.4921 | 1001.4992 | [M-H] <sup>+</sup> : 937.48, 893.49, 633.40                                    | 324.09 | As, Co,<br>SF1 |
| 112 | 53.95 | Agroastragaloside IV | C49H80O20 | 10.5 | 0.81  | 987.5173 | 1032.5471 | [M-H] <sup>+</sup> : 941.51, 715.49, 615.43, 457.41                            | 335.51 | As, Co,<br>SF1 |
| 113 | 54.01 | Foetidissimoside A   | C52H81O22 | 12.5 | 0.72  | 1057.521 |           | [M-H] <sup>+</sup> : 1011.52, 941.51, 871.47, 665.39, 485.24,<br>257.13        | 323.26 | As             |
| 114 | 54.48 | Isoastragaloside II  | C43H70O15 | 9.5  | 2.49  | 825.4657 | 871.4694  | [M-H] <sup>+</sup> : 783.46, 621.40, 603.39, 489.35                            | 310.67 | As, SF1        |
| 115 | 54.54 | Unknown              | C41H66O13 | 9.5  | 2.54  | 765.4445 | 811.4407  | [M-H] <sup>+</sup> : 719.28, 629.19, 485.11, 383.09                            | 286    | As, SF1        |
| 116 | 54.82 | Unknown              | C48H78O17 | 10.5 | -1.15 | 925.5156 | 971.5206  | [M-H] <sup>+</sup> : 907.50, 863.51, 717.46, 537.39, 509.40,<br>439.36         | 317.31 | As, SF1        |
| 117 | 55.14 | Cyclocephaloside II  | C43H70O15 | 9.5  | 2.11  | 825.4654 | 871.4692  | [M-H] <sup>+</sup> : 783.47, 765.44, 603.39, 489.35                            | 294.82 | As, SF1        |
| 118 | 55.32 | Unknown              | C45H74O16 | 9.5  | -0.69 | 869.4893 | 915.4948  | [M-H] <sup>+</sup> : 767.46, 605.41, 473.44                                    | 331.34 | As, Co,<br>SF1 |
| 119 | 55.39 | Unknown              | C48H76O18 | 11.5 | 0.02  | 939.4959 | 985.4992  | [M-H] <sup>+</sup> : 921.47, 877.50, 523.40, 793.46, 731.46,<br>613.37, 455.33 | 317.24 | As, Co,<br>SF1 |

|     |           |                            |           |      |       |          |           |                                                              |        |                |
|-----|-----------|----------------------------|-----------|------|-------|----------|-----------|--------------------------------------------------------------|--------|----------------|
| 120 | 55.45     | Cyclogaleginoside A+C5H8O4 | C35H72O19 | 0.5  | 3.26  | 795.4615 | 841.4589  | [M-H] <sup>+</sup> : 633.31, 615.38, 457.37                  | 301.93 | As, SF1        |
| 121 | 55.62     | Cyclogaleginoside A        | C37H60O10 | 8.5  | 2.59  | 663.4125 | 709.4170  | [M-H] <sup>+</sup> : 617.32, 435.00, 315.00, 293.21          | 207.31 | As, SF1        |
| 122 | 55.69     | Unknown                    | C54H84O21 | 13.5 | 1.01  | 1067.544 | 1113.5503 | [M-H] <sup>+</sup> : 1049.54, 821.53, 641.43, 483.48         | 339.61 | As, Co         |
| 123 | 55.74     | Unknown                    | C47H76O16 | 10.5 | -1.38 | 895.5048 |           | [M-H] <sup>+</sup> : 877.49, 749.45, 537.39, 509.40, 439.36  | 315.16 | As, SF1        |
| 124 | 56.18     | Unknown                    | C37H16O18 | 8.5  | 2.58  | 747.0248 | 793.4385  | [M-H] <sup>+</sup> : 709.42, 629.39, 409.27, 311.22, 293.20  | 301.92 | As, Co,<br>SF1 |
| 125 | 56.57     | Unknown                    | C36H58O9  | 8.5  | 0.80  | 633.4013 | 679.0258  | [M-H] <sup>+</sup> : 545.30, 487.26, 327.21, 309.21          | 254.63 | As             |
| 126 | 56.60     | Unknown                    | C45H74O15 | 9.5  | -0.58 | 853.4950 | 899.4997  | [M-H] <sup>+</sup> : 827.42, 707.39, 647.32, 605.38, 491.34  | 301.56 | As, SF1        |
| 127 | 57.15     | Isoastragaloside I         | C45H72O16 | 10.5 | 0.46  | 867.4752 | 913.4812  | [M-H] <sup>+</sup> : 765.44, 717.42, 633.40, 489.36          | 326.62 | As, SF1        |
| 128 | 57.37     | Acetylstragaloside I       | C47H74O17 | 11.5 | 2.85  | 909.4874 | 955.5592  | [M-H] <sup>+</sup> : 867.58, 849.61, 825.60, 807.58, 747.53  | 377.98 | As, SF1        |
| 129 | 57.39     | Unknown                    | C48H74O19 | 12.5 | 1.60  | 953.4767 |           | [M-H] <sup>+</sup> : 935.44, 909.48, 891.747.43, 489.58      | 333.36 | As, Co         |
| 130 | 1.94      | Codonopiloside A           | C19H29O9N | 5.5  | -4.26 | 416.190  | 438.1748  | [M+H] <sup>+</sup> : 398.18, 254.14, 236.13, 218.12, 205.09, | 190.32 | Co, SF1        |
| 131 | 1.98      | Unknown                    | C16H23O7N | 5.5  | -1.52 | 342.154  | 364.1362  | [M+H] <sup>+</sup> : 324.14, 306.13, 250.14, 176.09, 161.06, | 173.32 | Co, SF1        |
| 132 | 2.03      | Unknown                    | C15H21O7N | 5.5  | -2.83 | 328.138  |           | [M+H] <sup>+</sup> : 310.13, 292.12, 282.13, 162.08, 132.07  | 168.99 | Co, SF1        |
| 133 | Alkaloids | Unknown                    | C18H27O9N | 5.5  | -2.85 | 402.174  |           | [M+H] <sup>+</sup> : 384.16, 240.12, 222.11, 204.10, 146.08, | 186    | As, SF1        |
| 134 | 2.36      | Unknown                    | C15H21O7N | 5.5  | -4.50 | 328.138  |           | [M+H] <sup>+</sup> : 310.13, 292.12, 221.08, 132.07          | 168.99 | As, SF1        |
| 135 | 2.87      | Isomer of Codonopiloside A | C19H29O9N | 5.5  | -4.34 | 416.190  | 438.172   | [M+H] <sup>+</sup> : 398.18, 254.14, 236.13, 218.12, 205.09, | 190.32 | Co, SF1        |
| 136 | 3.01      | Codonopiloside+CH2         | C20H31O9N | 5.5  | -4.75 | 430.206  |           | [M+H] <sup>+</sup> : 412.19, 268.15, 250.14, 232.13, 205.09, | 182.49 | Co, SF1        |

|     |      |                            |                |      |       |              |          |                                                                                                |        |                |
|-----|------|----------------------------|----------------|------|-------|--------------|----------|------------------------------------------------------------------------------------------------|--------|----------------|
| 137 | 3.41 | Isomer of Codonopiloside A | C19H29O9N      | 5.5  | -4.94 | 416.190<br>6 | 438.1729 | [M+H] <sup>+</sup> : 398.18, 254.14, 236.13, 218.12                                            | 199.34 | Co, SF1        |
| 138 | 4.50 | Unknown                    | C16H21O7N      | 6.5  | -3.61 | 340.138<br>4 |          | [M+H] <sup>+</sup> : 325.53, 203.07, 185.04, 115.58                                            | 173.31 | Co, SF1        |
| 139 | 5.24 | Unknown                    | C25H23O5N<br>2 | 15   | -0.15 | 432.167<br>9 | 454.1494 | [M+H] <sup>+</sup> : 380.13, 282.10, 268.15, 252.09, 170.11,<br>159.44                         | 199.11 | As, SF1        |
| 140 | 5.27 | Unknown                    | C18H23O8N      | 7.5  | -2.44 | 382.149<br>3 |          | [M+H] <sup>+</sup> : 364.14, 354.15, 258.10, 186.08, 158.08,<br>140.07                         | 181.77 | Co, SF1        |
| 141 | 6.09 | Unknown                    | C21H37O10<br>N | 3.5  | -2.03 | 464.248<br>1 |          | [M+H] <sup>+</sup> : 301.07, 286.11, 258.11, 239.13, 190.12,<br>165.09, 137.06                 | 205.41 | As, Co         |
| 142 | 6.26 | Unknown                    | C29H41O16<br>N | 9.5  | -1.65 | 660.249<br>3 |          | [M+H] <sup>+</sup> : 445.15, 427.14, 385.13, 319.12, 177.05,<br>149.06                         | 241.02 | As, SF1        |
| 143 | 6.44 | Unknown                    | C22H37O13<br>N | 4.5  | -1.75 | 524.233<br>4 |          | [M+H] <sup>+</sup> : 507.21, 426.21, 345.15, 183.10, 165.09,<br>144.81                         | 211.41 | Co, SF1        |
| 144 | 6.71 | Codonopiloside+CH2         | C20H31O9N      | 5.5  | 0.65  | 430.206<br>9 |          | [M+H] <sup>+</sup> : 396.20, 287.12, 215.11, 197.10, 171.08,<br>128.06                         | 210.34 | Co, SF1        |
| 145 | 7.33 | Unknown                    | C34H43O13<br>N | 13.5 | -1.28 | 674.279<br>8 | 696.2684 | [M+H] <sup>+</sup> : 656.27, 638.26, 478.21, 460.20, 355.12,<br>387.14, 280.12, 233.08, 161.06 | 188.01 | Co, SF1        |
| 146 | 8.54 | Unknown                    | C15H19O6N      | 6.5  | 0.59  | 310.128<br>3 |          | [M+H] <sup>+</sup> : 292.12, 282.13, 274.11, 264.12, 221.08                                    | 167.06 | As, Co,<br>SF1 |
| 147 | 8.57 | Unknown                    | C21H35O11<br>N | 4.5  | -2.34 | 478.227<br>2 |          | [M+H] <sup>+</sup> : 450.20, 442.22, 373.13, 346.19, 268.10,<br>235.17, 166.98                 | 209.7  | Co, SF1        |
| 148 | 8.71 | Unknown                    | C15H19O6N      | 6.5  | -2.78 | 310.128<br>2 |          | [M+H] <sup>+</sup> : 292.12, 282.13, 211.08, 161.06, 114.05                                    | 167.06 | Co, SF1        |
| 149 | 9.06 | Unknown                    | C15H19O6N      | 6.5  | -0.59 | 310.128<br>3 |          | [M+H] <sup>+</sup> : 292.12, 282.13, 274.11, 264.12, 221.08,<br>166.12                         | 167.06 | Co, SF1        |

|     |       |                                  |                |      |       |              |                                                                                        |        |                |
|-----|-------|----------------------------------|----------------|------|-------|--------------|----------------------------------------------------------------------------------------|--------|----------------|
| 150 | 12.37 | Unknown                          | C19H29O6N      | 5.5  | -1.83 | 368.206<br>1 | [M+H] <sup>+</sup> : 350.20, 266.19, 221.08, 184.13, 177.05                            | 186.56 | Co, SF1        |
| 151 | 12.81 | Unknown                          | C18H27O5N      | 5.5  | -2.89 | 338.195<br>8 | [M+H] <sup>+</sup> : 250.14, 205.08, 161.06, 133.05                                    | 171.26 | Co, SF1        |
| 152 | 13.43 | Unknown                          | C28H37O15<br>N | 10.5 | 2.27  | 628.222<br>7 | [M+H] <sup>+</sup> : 449.14, 413.12, 287.09, 177.05, 153.05,<br>147.04                 | 236.9  | As, SF1        |
| 153 | 13.44 | Unknown                          | C28H37O15<br>N | 10.5 | -1.39 | 628.222<br>7 | [M+H] <sup>+</sup> : 449.14, 319.60, 287.09, 255.06, 177.05,<br>153.05, 147.04, 123.04 | 236.9  | As, SF1        |
| 154 | 15.81 | Unknown                          | C19H29O6N      | 5.5  | -1.94 | 368.206<br>1 | [M+H] <sup>+</sup> : 320.19, 266.14, 248.13, 202.14, 172.13                            | 193.37 | Co, SF1        |
| 155 | 16.69 | Unknown                          | C28H39O15<br>N | 9.5  | -3.09 | 630.237<br>9 | [M+H] <sup>+</sup> : 451.16, 355.12, 289.11, 167.07, 153.05,<br>144.86                 | 197.19 | As, SF1        |
| 156 | 17.32 | Codonopyrrolidium A              | C19H27O5N      | 6.5  | 1.55  | 350.195<br>2 | [M+H] <sup>+</sup> : 268.15, 250.14, 220.13, 205.09, 161.06                            | 186.7  | As, Co,<br>SF1 |
| 157 | 19.23 | Unknown                          | C26H41O13<br>N | 6.5  | -1.47 | 578.264<br>2 | [M+H] <sup>+</sup> : 397.18, 217.12, 199.11, 161.06                                    | 179.65 | As, Co,<br>SF1 |
| 158 | 19.46 | Codonopyrrolidium A+2H           | C19H29O5N      | 5.5  | -1.84 | 352.211<br>2 | [M+H] <sup>+</sup> : 334.20, 250.14, 232.13, 205.09, 161.06                            | 186.86 | Co, SF1        |
| 159 | 20.40 | Unknown                          | C28H41O11<br>N | 8.5  | -1.77 | 568.27       | [M+H] <sup>+</sup> : 466.26, 388.21, 331.15, 313.14, 287.13,<br>255.10, 189.09, 151.07 | 235.24 | Co, SF1        |
| 160 | 20.46 | Isomer of Codonopyrrolidium A+2H | C19H29O5N      | 5.5  | -4.40 | 352.210<br>3 | [M+H] <sup>+</sup> : 334.20, 250.14, 232.13, 205.09, 161.06                            | 186.86 | Co, SF1        |
| 161 | 21.26 | Isomer of Codonopyrrolidium A    | C19H27O5N      | 6.5  | 2.44  | 350.195<br>5 | [M+H] <sup>+</sup> : 268.15, 250.14, 205.09, 161.06                                    | 186.9  | Co, SF1        |
| 162 | 21.66 | Unknown                          | C29H41O15<br>N | 9.5  | 2.68  | 644.253<br>7 | [M+H] <sup>+</sup> : 429.15, 369.13, 303.12, 167.07, 149.06,<br>123.04                 | 245.5  | As, SF1        |

|     |       |                                  |           |      |       |         |                                                              |        |         |
|-----|-------|----------------------------------|-----------|------|-------|---------|--------------------------------------------------------------|--------|---------|
| 163 | 21.86 | Unknown                          | C24H39O12 | 5.5  | -1.91 | 534.253 | [M+H] <sup>+</sup> : 457.24, 402.21, 340.16, 291.12, 219.10, | 229    | As, SF1 |
|     |       |                                  | N         |      |       | 5       | 195.10, 163.07, 135.08                                       |        |         |
| 164 | 23.09 | Unknown                          | C24H31O10 | 9.5  | -3.42 | 494.200 | [M+H] <sup>+</sup> : 449.14, 342.72, 287.09, 177.05, 153.05, | 207.48 | As, SF1 |
|     |       |                                  | N         |      |       | 9       | 147.04                                                       |        |         |
| 165 | 23.49 | Isomer of Codonopyrrolidium A+2H | C19H29O5N | 5.5  | -2.70 | 352.210 | [M+H] <sup>+</sup> : 334.20, 250.14, 232.13, 202.14, 172.13  | 186.86 | Co, SF1 |
|     |       |                                  |           |      |       | 9       |                                                              |        |         |
| 166 | 24.73 | Isomer of Codonopyrrolidium A+2H | C19H29O5N | 5.5  | -4.97 | 352.210 | [M+H] <sup>+</sup> : 334.20, 250.14, 232.13, 202.14, 172.13  | 186.86 | Co, SF1 |
|     |       |                                  |           |      |       | 1       |                                                              |        |         |
| 167 | 24.83 | Isomer of Codonopyrrolidium A+2H | C19H29O5N | 5.5  | -3.71 | 352.211 | [M+H] <sup>+</sup> : 250.14, 202.14, 172.13                  | 186.86 | Co, SF1 |
|     |       |                                  |           |      |       | 1       |                                                              |        |         |
| 168 | 24.96 | Unknown                          | C34H47O19 | 11.5 | -1.90 | 774.280 | [M+H] <sup>+</sup> : 463.16, 457.37, 301.11, 269.08, 167.07, | 276.98 | As, SF1 |
|     |       |                                  | N         |      |       | 6       | 147.04                                                       |        |         |
| 169 | 25.48 | Unknown                          | C20H31O8N | 5.5  | -2.57 | 414.211 | [M+H] <sup>+</sup> : 397.18, 361.16, 235.13, 217.12, 199.11, | 206.11 | Co, SF1 |
|     |       |                                  |           |      |       | 2       | 161.10                                                       |        |         |
| 170 | 31.37 | Unknown                          | C28H37O14 | 10.5 | -2.27 | 612.227 | [M+H] <sup>+</sup> : 463.16, 301.11, 269.08, 167.07, 147.04  | 179.42 | As, SF1 |
|     |       |                                  | N         |      |       | 8       |                                                              |        |         |
| 171 | 31.61 | Unknown                          | C29H39O15 | 10.5 | -1.50 | 642.238 | [M+H] <sup>+</sup> : 625.21, 463.16, 301.11, 269.08, 207.07, | 225.84 | As, SF1 |
|     |       |                                  | N         |      |       | 3       | 191.07, 167.07, 147.04                                       |        |         |
| 172 | 33.67 | Unknown                          | C35H27O2N | 23   | 0.21  | 508.215 | [M+H] <sup>+</sup> : 480.18, 463.16, 269.08, 167.07, 147.04  | 213.73 | As, SF1 |
|     |       |                                  | 2         |      |       |         |                                                              |        |         |
| 173 | 36.71 | Unknown                          | C23H31O10 | 8.5  | -1.04 | 482.201 | [M+H] <sup>+</sup> : 465.17, 429.15, 369.13, 303.12, 167.07, | 209.65 | As, SF1 |
|     |       |                                  | N         |      |       | 6       | 149.06, 123.04                                               |        |         |
| 174 | 36.75 | Unknown                          | C25H35O10 | 8.5  | -4.49 | 510.231 | [M+H] <sup>+</sup> : 482.20, 303.12, 167.07, 149.06, 123.04  | 171.14 | As, SF1 |
|     |       |                                  | N         |      |       | 6       |                                                              |        |         |
| 175 | 36.76 | Unknown                          | C23H31O10 | 8.5  | -4.77 | 482.200 | [M+H] <sup>+</sup> : 465.17, 429.15, 303.12, 167.07, 149.06, | 207.42 | As, SF1 |
|     |       |                                  | N         |      |       | 3       | 123.04                                                       |        |         |



|     |       |                                                              |           |      |       |         |          |          |                                                              |        |                |
|-----|-------|--------------------------------------------------------------|-----------|------|-------|---------|----------|----------|--------------------------------------------------------------|--------|----------------|
| 176 | 46.61 | Unknown                                                      | C27H35O11 | 10.5 | -1.81 | 550.227 |          |          | [M+H] <sup>+</sup> : 505.17, 343.12, 301.11, 286.08, 273.11, | 233.23 | As, SF1        |
|     |       |                                                              | N         |      |       |         |          |          |                                                              |        |                |
| 177 | 46.74 | Unknown                                                      | C25H31O11 | 10.5 | -2.62 | 522.196 |          |          | [M+H] <sup>+</sup> : 505.17, 467.27, 301.11, 167.07, 147.04  | 215.84 | As, SF1        |
|     |       |                                                              | N         |      |       |         |          |          |                                                              |        |                |
| 178 | 52.63 | Unknown                                                      | C27H33O11 | 11.5 | -3.20 | 548.211 |          |          | [M+H] <sup>+</sup> : 531.18, 301.11, 167.07, 147.04          | 186.63 | As             |
|     |       |                                                              | N         |      |       |         |          |          |                                                              |        |                |
| 179 | 55.21 | Unknown                                                      | C34H47O13 | 11.5 | -4.50 | 678.308 |          |          | [M+H] <sup>+</sup> : 625.26, 607.29, 411.14, 393.13, 303.12, | 247.41 | As             |
|     |       |                                                              | N         |      |       |         |          |          |                                                              |        |                |
| 180 | 9.55  | (E)-2-Hexenyl-β-sophorodide                                  | C18H32O11 | 3.5  | -0.34 |         | 423.1868 | 469.1925 | [M-H] <sup>-</sup> : 261.13, 221.07, 179.06, 161.05          | 200.59 | Co, SF1        |
| 181 | 10.57 | (Z)-3-Hexenyl-β-sophorodide                                  | C18H32O11 | 3.5  | -0.34 |         | 423.1864 | 469.1927 | [M-H] <sup>-</sup> : 261.13, 221.07, 179.06, 161.05          | 200.59 | Co, SF1        |
| 182 | 11.26 | Isomer of Lobetyolinin                                       | C26H38O13 | 8.5  | -0.60 |         | 557.2236 | 603.2291 | [M-H] <sup>-</sup> : 395.17, 233.12, 215.11, 179.06, 161.05  | 219.33 | Co, SF1        |
| 183 | 12.40 | (-)-(7R,8S)- dihydrodehydrodiconiferyl alcohol 4-O-β-D-      | C32H44O16 | 11.5 | -0.77 |         | 683.2551 | 729.2606 | [M-H] <sup>-</sup> : 521.10, 341.10, 221.07, 179.06, 161.05  | 238.68 | As, Co,<br>SF1 |
|     |       | glucopyranosyl-(1"→2")-β-D-glucopyranoside                   |           |      |       |         |          |          |                                                              |        |                |
| 184 | 12.74 | (E)-2-hexenyl-α-L-arabinopyranosyl-(1→6)-β-D-glucopyranoside | C17H30O10 | 3.5  | -0.59 |         | 393.1764 | 439.1819 | [M-H] <sup>-</sup> : 261.13, 217.12, 191.06, 179.06, 161.05  | 196.54 | Co, SF1        |
| 185 | 13.12 | Unknown                                                      | C18H34O11 | 2.5  | 0.39  |         | 425.2030 | 471.2085 | [M-H] <sup>-</sup> : 263.15, 245.09, 221.07, 179.06, 161.05  | 196.05 | Co, SF1        |
| 186 | 14.19 | Unknown                                                      | C18H34O11 | 2.5  | -0.84 |         | 425.2025 | 471.2079 | [M-H] <sup>-</sup> : 263.15, 245.09, 221.07, 179.06, 161.05  | 196.05 | Co, SF1        |
|     |       |                                                              |           |      |       |         |          |          |                                                              |        |                |
| 187 | 14.74 | Lobetyolinin+Glu                                             | C32H48O18 | 9.5  | -0.75 |         | 719.2762 | 765.2830 | [M-H] <sup>-</sup> : 629.23, 485.15, 383.12, 341.11, 323.10, | 256.31 | Co, SF1        |
|     |       |                                                              |           |      |       |         |          |          |                                                              |        |                |
| 188 | 15.41 | Pratialin B                                                  | C32H48O18 | 9.5  | -0.75 |         | 719.2761 | 765.2825 | [M-H] <sup>-</sup> : 629.23, 485.15, 383.12, 341.11, 323.10, | 256.31 | Co, SF1        |
|     |       |                                                              |           |      |       |         |          |          |                                                              |        |                |
| 189 | 15.52 | Unknown                                                      | C26H34O11 | 10.5 | -0.37 |         | 521.2026 | 567.2082 | [M-H] <sup>-</sup> : 503.04, 341.14, 323.11, 197.08, 179.06, | 212.92 | As, Co,<br>SF1 |
|     |       |                                                              |           |      |       |         |          |          |                                                              |        |                |
| 190 | 15.68 | Isomer of Lobetyolinin+Glu                                   | C32H48O18 | 9.5  | -0.85 |         | 719.2762 | 765.2824 | [M-H] <sup>-</sup> : 557.22, 377.16, 179.06, 161.05          | 256.31 | Co, SF1        |
| 191 | 15.68 | Unknown                                                      | C26H38O13 | 8.5  | 0.60  |         | 557.2243 | 603.2296 | [M-H] <sup>-</sup> : 539.21, 443.16, 377.21, 215.11, 197.10, | 219.33 | Co, SF1        |
|     |       |                                                              |           |      |       |         |          |          |                                                              |        |                |
| 192 | 17.44 | Codonopilodinoside                                           | C26H42O12 | 6.5  | 0.61  |         | 545.2607 | 591.2661 | [M-H] <sup>-</sup> : 527.20, 441.18, 361.22, 343.47, 179.07, | 221.71 | Co, SF1        |

|     |       |                                                                                                                                                             |           |     |       |          |          |                                                                                |        |                |
|-----|-------|-------------------------------------------------------------------------------------------------------------------------------------------------------------|-----------|-----|-------|----------|----------|--------------------------------------------------------------------------------|--------|----------------|
|     |       |                                                                                                                                                             |           |     |       |          |          | 161.04, 149.05                                                                 |        |                |
| 193 | 17.85 | Isomer of Lobetyolinin                                                                                                                                      | C26H38O13 | 8.5 | -0.15 | 557.2239 | 603.2295 | [M-H] <sup>+</sup> : 395.17, 377.16, 305.12, 233.12, 179.06,<br>161.05         | 219.33 | Co, SF1        |
| 194 | 17.91 | Unknown                                                                                                                                                     | C26H38O13 | 8.5 | 0.06  | 557.2240 | 603.2297 | [M-H] <sup>+</sup> : 395.17, 377.16, 305.12, 233.12, 179.06,<br>161.05         | 219.33 | Co, SF1        |
| 195 | 19.22 | Isomer of Lobetyolinin                                                                                                                                      | C26H38O13 | 8.5 | 0.28  | 557.2241 | 603.2299 | [M-H] <sup>+</sup> : 233.12, 179.06, 161.05                                    | 219.33 | Co, SF1        |
| 196 | 19.44 | Unknown                                                                                                                                                     | C26H40O13 | 7.5 | 0.56  | 559.2399 | 605.2448 | [M-H] <sup>+</sup> : 341.11, 323.10, 263.08, 217.12, 179.06,<br>161.05         | 239.72 | Co, SF1        |
| 197 | 19.86 | Unknown                                                                                                                                                     | C26H38O13 | 8.5 | -0.15 | 557.2241 | 603.2298 | [M-H] <sup>+</sup> : 443.16, 377.16, 305.12, 233.12, 179.06,<br>161.05         | 219.33 | Co, SF1        |
| 198 | 20.72 | (3 <i>S</i> ,6 <i>E</i> ,9 <i>E</i> )-5-O- $\beta$ -D-Glcp-(1 $\rightarrow$ 6)-O- $\beta$ -D-Glcp-3,5,11-trihydroxy-<br>3,7,11-trimethyldodeca-1,6,9-triene | C27H46O13 | 5.5 | -2.33 | 577.2863 | 623.2918 | [M-H] <sup>+</sup> : 414.99, 234.26, 215.01, 179.06, 161.05                    | 239.13 | Co, SF1        |
| 199 | 21.12 | Isomer of Lobetyolinin                                                                                                                                      | C26H38O13 | 8.5 | 0.50  | 557.2242 | 603.2299 | [M-H] <sup>+</sup> : 233.12, 179.06, 161.05                                    | 219.33 | Co, SF1        |
| 200 | 23.61 | Cordifolioidyne C/Codonopilodiyinoside A                                                                                                                    | C20H28O8  | 7.5 | 1.08  | 395.1711 | 441.1765 | [M-H] <sup>+</sup> : 305.13, 233.12, 215.11, 179.06, 143.07                    | 194.25 | Co, SF1        |
| 201 | 24.21 | Isomer of Cordifolioidyne C/Codonopilodiyinoside A                                                                                                          | C20H28O8  | 7.5 | 1.54  | 395.1712 | 441.1766 | [M-H] <sup>+</sup> : 305.12, 215.11, 179.05, 143.07                            | 194.25 | Co, SF1        |
| 202 | 25.28 | Codonopiloenyenoside A                                                                                                                                      | C20H30O8  | 6.5 | -0.36 | 397.1866 | 443.1921 | [M-H] <sup>+</sup> : 235.13, 217.12, 179.06, 161.05                            | 185.22 | Co, SF1        |
| 203 | 25.32 | Lobetyolin                                                                                                                                                  | C20H28O8  | 7.5 | 0.93  | 395.1715 | 441.1770 | [M-H] <sup>+</sup> : 305.12, 233.12, 215.11, 185.10, 143.07                    | 194.25 | Co, SF1        |
| 204 | 25.55 | Cordifolioidyne C/Codonopilodiyinoside A/ Codonopilodiyinoside<br>L/Codonopilodiyinoside M                                                                  | C20H28O8  | 7.5 | 2.32  | 395.1715 | 441.1771 | [M-H] <sup>+</sup> : 305.12, 215.11, 179.06, 143.07                            | 194.25 | Co, SF1        |
| 205 | 30.21 | Unknown                                                                                                                                                     | C20H36O12 | 3.5 | -0.49 | 467.2132 | 513.2186 | [M-H] <sup>+</sup> : 425.20, 407.18, 305.20, 263.15, 221.07,<br>179.06, 161.05 | 200    | As, Co,<br>SF1 |
| 206 | 30.51 | Unknown                                                                                                                                                     | C32H52O16 | 7.5 | 1.56  | 691.3193 | 737.3241 | [M-H] <sup>+</sup> : 529.27, 397.22, 293.09, 221.07, 179.06,<br>161.05         | 229.57 | Co             |
| 207 | 32.77 | Codonopilodiyinoside G                                                                                                                                      | C26H38O12 | 8.5 | 0.70  | 541.2294 | 587.2346 | [M-H] <sup>+</sup> : 341.11, 323.10, 263.08, 217.12, 179.06,<br>161.05         | 237.16 | Co, SF1        |
| 208 | 38.32 | Unknown                                                                                                                                                     | C27H46O12 | 5.5 | 0.82  | 561.2916 | 607.2971 | [M-H] <sup>+</sup> : 399.24, 341.20, 221.07, 179.06, 161.05                    | 225.67 | Co             |

|            |              |                                                                                                  |                  |             |             |                 |                 |                                                                                |               |                |
|------------|--------------|--------------------------------------------------------------------------------------------------|------------------|-------------|-------------|-----------------|-----------------|--------------------------------------------------------------------------------|---------------|----------------|
| 209        | 40.57        | Codonopilodiyoside G/Kodonopilodiyoside K                                                        | C26H38O12        | 8.5         | 0.81        | 541.2289        | 587.2344        | [M-H] <sup>+</sup> : 341.11, 323.10, 263.08, 217.12, 179.06,<br>161.05         | 214.95        | Co, SF1        |
| 210        | 11.78        | Tangshenoside I                                                                                  | C29H42O18        | 9.5         | -0.60       | 677.2294        |                 | [M-H] <sup>+</sup> : 497.17, 453.18, 261.10                                    | 256.9         | Co             |
| 211        | 14.98        | Tangshenoside V                                                                                  | C21H26O12        | 9.5         | -1.02       | 469.1347        |                 | [M-H] <sup>+</sup> : 325.09, 265.07, 235.06, 163.04, 143.04                    | 213.52        | Co, SF1        |
| 212        | 16.47        | Hexyl-1-O- $\alpha$ -L-arabinofuranosyl(1 $\rightarrow$ 6)- $\beta$ -D-glucopyranoside           | C17H32O10        | 2.5         | 0.13        | 395.1923        | 441.1978        | [M-H] <sup>+</sup> : 263.15, 233.07, 191.06, 161.05                            | 194.25        | Co, SF1        |
| 213        | 17.81        | Isomer of Hexyl-1-O- $\alpha$ -L-arabinofuranosyl(1 $\rightarrow$ 6)- $\beta$ -D-glucopyranoside | C17H32O10        | 2.5         | -0.41       | 395.1921        | 441.1979        | [M-H] <sup>+</sup> : 263.15, 233.07, 191.06, 161.05                            | 194.25        | Co, SF1        |
| <b>214</b> | <b>21.11</b> | <b>Syringaresinol 4'-O-glucopyranoside</b>                                                       | <b>C28H35O13</b> | <b>11.5</b> | <b>1.79</b> | <b>579.2094</b> | <b>625.2141</b> | <b>[M-H]<sup>+</sup>: 417.16, 402.13, 387.10, 371.15, 181.05</b>               | <b>209.73</b> | <b>As, SF1</b> |
| 215        | 28.35        | Codonoside A                                                                                     | C38H48O20        | 15.5        | 0.21        | 823.2657        |                 | [M-H] <sup>+</sup> : 689.33, 575.27, 539.2565                                  | 283.35        | Co             |
| 216        | 45.92        | 9,12,13-Trihydroxy-10,15-octadecadienoic Acid                                                    | C18H32O5         | 3.5         | 0.13        | 327.2177        |                 | [M-H] <sup>+</sup> : 309.16, 291.18, 229.12, 211.11, 171.10                    | 177.48        | As, Co,<br>SF1 |
| 217        | 49.71        | 9,12,13-Trihydroxy-10-octadecadienoic Acid                                                       | C18H34O5         | 2.5         | -1.25       | 329.2337        |                 | [M-H] <sup>+</sup> : 311.19, 293.21, 229.12, 211.10, 171.10                    | 175.19        | As, Co,<br>SF1 |
| 218        | 50.17        | 9,12,13-Trihydroxy-11-octadecadienoic Acid                                                       | C18H34O5         | 2.5         | 1.07        | 329.2334        |                 | [M-H] <sup>+</sup> : 311.18, 293.22, 229.11, 211.11                            | 175.19        | As, Co,<br>SF1 |
| 219        | 50.69        | 9,12,13-Trihydroxy-12-octadecadienoic Acid                                                       | C18H34O5         | 2.5         | -0.02       | 329.2333        |                 | [M-H] <sup>+</sup> : 311.18, 293.21, 171.04                                    | 175.19        | As, Co,<br>SF1 |
| 220        | 55.86        | Unknown                                                                                          | C30H54O10        | 4.5         | -0.39       | 573.3642        | 619.3347        | [M-H] <sup>+</sup> : 555.35, 499.33, 481.32, 329.23, 293.21,<br>211.13, 171.10 | 225.97        | As, Co         |
| 221        | 57.52        | 9,10-Dihydroxy-12-Octadecenoic Acid-2H                                                           | C18H32O4         | 3.5         | -0.49       | 311.2226        |                 | [M-H] <sup>+</sup> : 293.22, 275.22, 201.09, 181.13                            | 175.58        | As, Co,<br>SF1 |
| 222        | 58.38        | 9,10-Dihydroxy-12-Octadecenoic Acid                                                              | C18H34O4         | 2.5         | 0.69        | 313.2386        |                 | [M-H] <sup>+</sup> : 295.23, 277.22, 195.12, 183.12                            | 175.53        | As, Co         |
| 223        | 58.76        | Isomer of 9,10-Dihydroxy-12-Octadecenoic Acid                                                    | C18H34O4         | 2.5         | 0.18        | 313.2385        |                 | [M-H] <sup>+</sup> : 295.23, 201.11, 171.10                                    | 175.53        | As, Co         |

Bold indicates the components were compared with reference compounds.
